# Supplementary material for: Theoretical study on lithiation mechanism of benzoquinone-based macrocyclic compounds as cathode for lithium-ion batteries
Source: Royal Society of Chemistry journal article supplement (doi:10.1039/c9cp00403c), 2019-01-01
Supplement: c9cp00403c1.pdf [file c9cp00403c1.pdf]

# Supporting Information

## Theoretical study on lithiation mechanism of benzoquinone-based macrocyclic compounds as cathode for lithium-ion batteries

Qiancheng Zhao, Licheng Miao, Mingyue Ma, LuoJia Liu, and Jun Chen\*

*Key Laboratory of Advanced Energy Materials Chemistry (Ministry of Education), Renewable Energy Conversion and Storage Center, College of Chemistry, Nankai University, Tianjin 300071, China*

\*Corresponding author (email: chenabc@nankai.edu.cn)

### Contents

|                                                                                                                |          |
|----------------------------------------------------------------------------------------------------------------|----------|
| <b>1. Solvation effect simulation.....</b>                                                                     | <b>2</b> |
| <b>2. Figure S1. HOMO diagrams of C4Q with different reduced forms (Top view) .....</b>                        | <b>3</b> |
| <b>3. Figure S2. Energies of C4Q with different reduced forms.....</b>                                         | <b>3</b> |
| <b>4. Table S1. Fukui indices of C4QLi<sub>0-7</sub> .....</b>                                                 | <b>4</b> |
| <b>5. Table S2. Thermal Gibbs free energy change of C4Q.....</b>                                               | <b>4</b> |
| <b>6. Table S3. Fukui indices of P5QLi<sub>1-9</sub> .....</b>                                                 | <b>5</b> |
| <b>7. Table S4. Thermal Gibbs free energy change of P5Q.....</b>                                               | <b>5</b> |
| <b>8. Scheme S1. The example of how ion transfer step affect electron transfer step in redox reaction.....</b> | <b>6</b> |

|                                                                             |          |
|-----------------------------------------------------------------------------|----------|
| <b>9. Table S5. Total energies of C4Q with different reduced forms.....</b> | <b>6</b> |
| <b>10. Optimized geometries.....</b>                                        | <b>7</b> |

## Solvation effect simulation

In the lithiation mechanism investigation of cathode material, the solvation effect is very important and should be considered in the calculations.<sup>S1</sup> So we use the implicit solvent model to describe solvation effect in the lithiation mechanism investigation of the benzoquinone-based macrocyclic compounds. It is no doubt that some side reactions will affect the electrochemical reaction in the batteries system. With regard to the behavior of co-intercalation and the formation of solid electrolyte interphases (SEI), it widely exists in layered inorganic anodes, such as graphite.<sup>S2</sup> However, the co-intercalation has not been found in organic carbonyl cathodes for LIBs and there are still occasional arguments that SEI in traditional sense does not exist on cathode side.<sup>S3</sup> In fact, the reaction mechanism of organic carbonyl compounds as cathode in LIBs is the binding of Li<sup>+</sup> ions with the carbonyl oxygen of cathodes.<sup>S4</sup> As for BQ-based macrocyclic compounds, they are no exception. For the effect of solvation, it is only correlated to the redox potentials and capacity fading which caused by the dissolution of organic cathodes.<sup>S5</sup> Lots of reported literatures use the implicit solvent model to calculate the redox potentials and have achieved credible results.<sup>S6-S8</sup> Therefore, we choose the implicit solvent model (SMD)<sup>S9</sup> in this work. As Donald G. Truhlar *et al.* has pointed out, “A key advantage of the SMD approach is that the non-bulk-electrostatic effects are parametrized to be consistent with a given choice of solute radii. If the solute radii are changed and the parametrization repeated, one obtains similar results; thus the sensitivity to the choice of radii is diminished.”<sup>S10</sup> Thus, SMD can also simulate the solvent effect at the interface to some extent.

- S1 S. J. Yang, X. Y. Qin, R. He, W. Shen, M. Li and L. B. Zhao, *Phys. Chem. Chem. Phys.*, 2017, **19**, 12480-12489.
- S2 H. J. Santner, K. C. Möller, J. Ivančo, M. G. Ramsey, F. P. Netzer, S. Yamaguchi, J. O. Besenhard and M. Winter, *J. Power Sources*, 2003, **119-121**, 368-372.
- S3 K. Xu and A. von Cresce, *J. Mater. Chem.*, 2011, **21**, 9849.
- S4 Y. Wu, R. Zeng, J. Nan, D. Shu, Y. Qiu and S.-L. Chou, *Adv. Energy Mater.*, 2017, **7**, 1700278.
- S5 K. C. Kim, T. Liu, S. W. Lee and S. S. Jang, *J. Am. Chem. Soc.*, 2016, **138**, 2374-2382.
- S6 D. J. Kim, K. R. Hermann, A. Prokofjevs, M. T. Otley, C. Pezzato, M. Owczarek and J. F. Stoddart, *J. Am. Chem. Soc.*, 2017, **139**, 6635-6643.
- S7 D. Wu, Z. Xie, Z. Zhou, P. Shen and Z. Chen, *J. Mater. Chem. A*, 2015, **3**, 19137-19143.
- S8 J. H. Park, T. Liu, K. C. Kim, S. W. Lee and S. S. Jang, *ChemSusChem*, 2017, **10**, 1584-1591.
- S9 A. V. Marenich, C. J. Cramer and D. G. Truhlar, *J. Phys. Chem. B*, 2009, **113**, 6378-6396.
- S10 A. V. Marenich, J. Ho, M. L. Coote, C. J. Cramer and D. G. Truhlar, *Phys. Chem. Chem. Phys.*, 2014, **16**, 15068-15106.

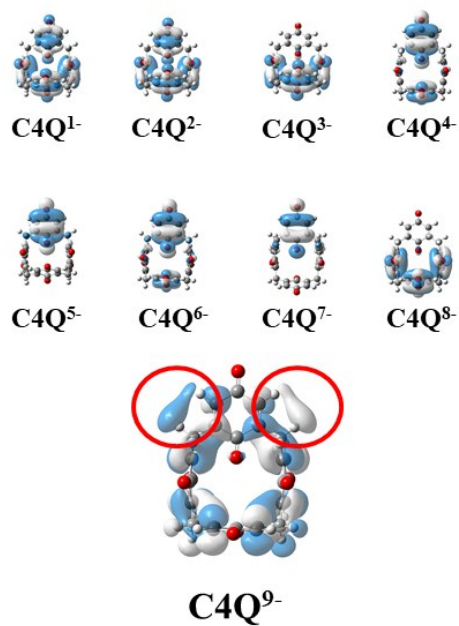

**Fig. S1** HOMO diagrams of C4Q with different reduced forms at B3LYP/6-31G(d) (Top view).

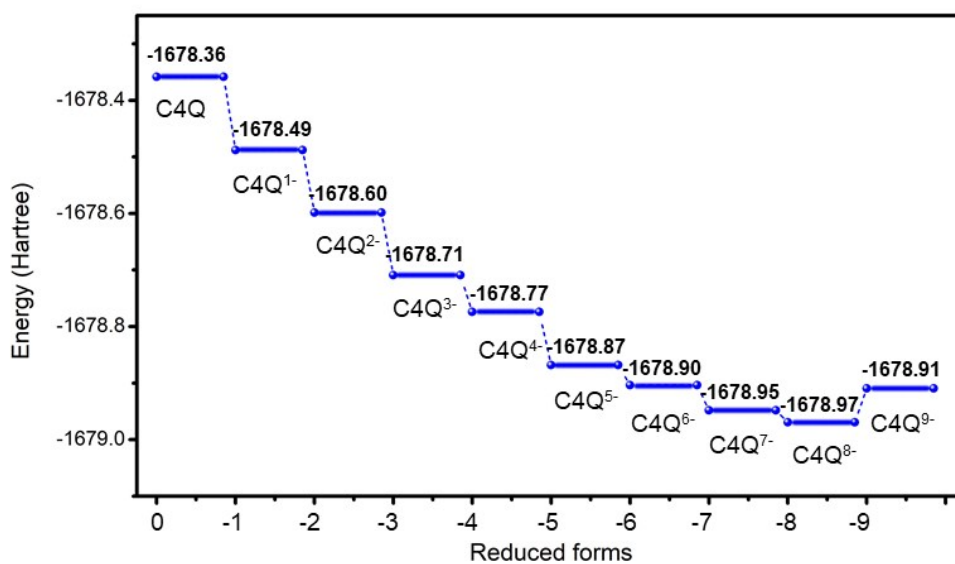

**Fig. S2** Energies of C4Q with different reduced forms at B3LYP/6-31G(d)

**Table S1.** Fukui indices of each oxygen atom in C4QLi<sub>0~7</sub> during the lithiation process.

| Species                    | Atom         |       |              |              |              |              |              |        |
|----------------------------|--------------|-------|--------------|--------------|--------------|--------------|--------------|--------|
|                            | O1           | O2    | O3           | O4           | O5           | O6           | O7           | O8     |
| C4QLi <sub>0</sub> $f_o^+$ | 0.058        | 0.034 | 0.034        | 0.035        | 0.049        | 0.049        | <b>0.180</b> | 0.018  |
| C4QLi <sub>1</sub> $f_o^+$ | 0.022        | 0.042 | 0.042        | 0.012        | <b>0.114</b> | 0.114        | 0.046        | 0.001  |
| C4QLi <sub>2</sub> $f_o^+$ | 0.047        | 0.034 | 0.052        | 0.010        | 0.038        | 0.065        | <b>0.087</b> | -0.077 |
| C4QLi <sub>3</sub> $f_o^+$ | 0.012        | 0.023 | 0.110        | 0.011        | 0.030        | <b>0.123</b> | 0.006        | -0.048 |
| C4QLi <sub>4</sub> $f_o^+$ | 0.020        | 0.083 | 0.013        | 0.035        | <b>0.096</b> | 0.007        | 0.012        | -0.045 |
| C4QLi <sub>5</sub> $f_o^+$ | 0.030        | 0.018 | 0.035        | <b>0.064</b> | 0.010        | 0.040        | 0.034        | 0.021  |
| C4QLi <sub>6</sub> $f_o^+$ | 0.034        | 0.020 | <b>0.053</b> | 0.047        | 0.012        | 0.037        | 0.040        | -0.010 |
| C4QLi <sub>7</sub> $f_o^+$ | <b>0.064</b> | 0.028 | 0.012        | 0.025        | 0.014        | 0.054        | 0.055        | -0.151 |

**Table S2.** Thermal Gibbs free energy change (including zero-point energy) of C4Q in each lithiation step. The  $\Delta G_{IT}$  (in eV) and  $\Delta G_{ET}$  (in eV) corresponding to the Gibbs free energy change of ion transfer step and electron transfer step, respectively.

| Discharge process                      | Pattern 1       |                 | Pattern 2       |                 |
|----------------------------------------|-----------------|-----------------|-----------------|-----------------|
|                                        | $\Delta G_{IT}$ | $\Delta G_{ET}$ | $\Delta G_{IT}$ | $\Delta G_{ET}$ |
| C4Q→C4QLi <sub>1</sub>                 | -0.42           | -2.78           | -1.23           | -1.97           |
| C4QLi <sub>1</sub> →C4QLi <sub>2</sub> | -0.39           | -2.56           | -1.05           | -1.91           |
| C4QLi <sub>2</sub> →C4QLi <sub>3</sub> | -0.32           | -2.56           | -0.91           | -1.97           |
| C4QLi <sub>3</sub> →C4QLi <sub>4</sub> | -0.75           | -2.29           | -1.71           | -1.35           |
| C4QLi <sub>4</sub> →C4QLi <sub>5</sub> | -0.64           | -2.29           | -0.91           | -2.02           |
| C4QLi <sub>5</sub> →C4QLi <sub>6</sub> | -0.72           | -2.25           | -1.73           | -1.25           |
| C4QLi <sub>6</sub> →C4QLi <sub>7</sub> | -0.67           | -2.11           | -1.38           | -1.39           |
| C4QLi <sub>7</sub> →C4QLi <sub>8</sub> | -0.64           | -1.85           | -1.99           | -0.51           |

**Table S3.** Fukui indices of each oxygen atom in P5QLi<sub>1~9</sub> during the lithiation process.

| Species                    | Atom   |              |              |              |              |       |        |              |        |              |
|----------------------------|--------|--------------|--------------|--------------|--------------|-------|--------|--------------|--------|--------------|
|                            | O1     | O2           | O3           | O4           | O5           | O6    | O7     | O8           | O9     | O10          |
| P5QLi <sub>1</sub> $f_o^+$ | -0.026 | <b>0.114</b> | 0.063        | 0.040        | 0            | 0.065 | 0.084  | 0.034        | 0.002  | -0.014       |
| P5QLi <sub>2</sub> $f_o^+$ | -0.007 | 0.087        | <b>0.087</b> | -0.007       | -0.004       | 0.058 | 0.058  | 0.014        | -0.004 | 0.014        |
| P5QLi <sub>3</sub> $f_o^+$ | -0.008 | <b>0.086</b> | 0.053        | 0.018        | 0.003        | 0.071 | 0.068  | 0.017        | 0.006  | -0.011       |
| P5QLi <sub>4</sub> $f_o^+$ | -0.002 | 0.008        | <b>0.136</b> | 0.037        | 0.012        | 0.018 | 0.085  | 0.033        | 0.017  | 0.001        |
| P5QLi <sub>5</sub> $f_o^+$ | 0.003  | 0.007        | -0.004       | <b>0.154</b> | 0.027        | 0.003 | 0.019  | -0.004       | 0.035  | 0.004        |
| P5QLi <sub>6</sub> $f_o^+$ | 0.006  | 0.005        | -0.002       | 0.027        | <b>0.191</b> | 0.002 | 0.010  | -0.019       | 0.111  | 0.006        |
| P5QLi <sub>7</sub> $f_o^+$ | 0.001  | 0.003        | -0.008       | 0.101        | 0.035        | 0.001 | 0.006  | <b>0.110</b> | 0.020  | 0.003        |
| P5QLi <sub>8</sub> $f_o^+$ | 0.100  | 0.055        | 0.001        | 0.002        | 0.005        | 0.061 | -0.005 | 0.005        | 0.003  | <b>0.133</b> |
| P5QLi <sub>9</sub> $f_o^+$ | -0.001 | <b>0.187</b> | 0.004        | 0.001        | 0.002        | 0.162 | -0.011 | 0.001        | -0.001 | 0.006        |

**Table S4.** Thermal Gibbs free energy change (including zero-point energy) of P5Q in each lithiation step. The  $\Delta G_{IT}$  (in eV) and  $\Delta G_{ET}$  (in eV) corresponding to the Gibbs free energy change of ion transfer step and electron transfer step, respectively.

| Discharge process                                    | Pattern 1       |                 | Pattern 2       |                 |
|------------------------------------------------------|-----------------|-----------------|-----------------|-----------------|
|                                                      | $\Delta G_{IT}$ | $\Delta G_{ET}$ | $\Delta G_{IT}$ | $\Delta G_{ET}$ |
| P5QLi $\rightarrow$ P5QLi <sub>1</sub>               | -0.04           | -2.82           | -1.36           | -1.5            |
| P5QLi <sub>1</sub> $\rightarrow$ P5QLi <sub>2</sub>  | -1.82           | -2.81           | -2.65           | -1.98           |
| P5QLi <sub>2</sub> $\rightarrow$ P5QLi <sub>3</sub>  | -0.25           | -2.70           | -1.01           | -1.99           |
| P5QLi <sub>3</sub> $\rightarrow$ P5QLi <sub>4</sub>  | -1.39           | -2.55           | -2.35           | -1.58           |
| P5QLi <sub>4</sub> $\rightarrow$ P5QLi <sub>5</sub>  | -0.24           | -2.73           | -0.76           | -2.2            |
| P5QLi <sub>5</sub> $\rightarrow$ P5QLi <sub>6</sub>  | -0.13           | -2.52           | -1.32           | -1.33           |
| P5QLi <sub>6</sub> $\rightarrow$ P5QLi <sub>7</sub>  | -0.73           | -2.37           | -1.51           | -1.58           |
| P5QLi <sub>7</sub> $\rightarrow$ P5QLi <sub>8</sub>  | -0.24           | -2.22           | -1.31           | -1.15           |
| P5QLi <sub>8</sub> $\rightarrow$ P5QLi <sub>9</sub>  | -0.11           | -2.24           | -0.85           | -1.5            |
| P5QLi <sub>9</sub> $\rightarrow$ P5QLi <sub>10</sub> | -1.01           | -2.05           | -1.23           | -1.83           |

**Scheme S1.** The example of how ion transfer step affects electron transfer step in redox reaction of C4Q.

Initial state : the activity of  $\text{Li}^+$  ions is  $A_0$  ( $A_0 > K_{\text{eq}5}^{-1}$ )

$$\Delta G_{\text{eq}4}^{\circ} = \Delta G_{\text{eq}4}^{\theta} + RT \ln A_0$$

$$\Delta G_{\text{eq}5}^{\circ} = RT \ln Q_{\text{r}0} - RT \ln K_{\text{eq}5} = RT \ln \frac{K_{\text{eq}5}^{-1}}{A_0}$$

After change: the activity of  $\text{Li}^+$  ion changed from  $A_0$  to  $a_{\text{Li}^+}$  by eq.5 ( $A_0 > a_{\text{Li}^+} > K_{\text{eq}5}^{-1}$ )

$$\Delta G_{\text{eq}4} = \Delta G_{\text{eq}4}^{\theta} + RT \ln a_{\text{Li}^+} = \Delta G_{\text{eq}4}^{\theta} - RT \ln A_0 + RT \ln a_{\text{Li}^+} = \Delta G_{\text{eq}4}^{\theta} + RT \ln \frac{a_{\text{Li}^+}}{A_0}$$

$$= \Delta G_{\text{eq}4}^{\theta} + \Delta G_{\text{eq}5}^{\theta} \left( \frac{\ln \frac{a_{\text{Li}^+}}{A_0}}{\ln \frac{K_{\text{eq}5}^{-1}}{A_0}} \right) = \Delta G_{\text{eq}4}^{\theta} + x \Delta G_{\text{eq}5}^{\theta}$$

when  $a_{\text{Li}^+} \approx A_0$ ,  $x \approx 0$

**Table S5.** Total energies of C4Q with different reduced forms.

| Species           | Total energy (hartree) |
|-------------------|------------------------|
| C4Q               | -1678.358437           |
| C4Q <sup>1-</sup> | -1678.487718           |
| C4Q <sup>2-</sup> | -1678.598450           |
| C4Q <sup>3-</sup> | -1678.708953           |
| C4Q <sup>4-</sup> | -1678.774100           |
| C4Q <sup>5-</sup> | -1678.868073           |
| C4Q <sup>6-</sup> | -1678.903497           |
| C4Q <sup>7-</sup> | -1678.947915           |
| C4Q <sup>8-</sup> | -1678.969160           |
| C4Q <sup>9-</sup> | -1678.909438           |

## Optimized geometries

### C4Q

E= -1678.35843681 hartrees

| Symbol | X           | Y           | Z           |
|--------|-------------|-------------|-------------|
| C      | 1.13060300  | 4.19445000  | 1.26918200  |
| C      | 1.14382700  | 2.84800600  | 1.29134100  |
| C      | 1.15194700  | 2.09191900  | 0.00000000  |
| C      | 1.14382700  | 2.84800600  | -1.29134100 |
| C      | 1.13060300  | 4.19445000  | -1.26918200 |
| C      | 1.12651100  | 4.95638100  | 0.00000000  |
| C      | -2.42372200 | 0.55301600  | -2.77766900 |
| C      | -1.29377000 | 1.50332100  | -2.71917800 |
| C      | -0.01396300 | 1.08701800  | -2.67687200 |
| C      | 0.28423500  | -0.38012400 | -2.77815800 |
| C      | -0.85023400 | -1.35128500 | -2.66586900 |
| C      | -2.11490100 | -0.89228700 | -2.69785500 |
| C      | -0.52600400 | -3.04267000 | 0.00000000  |
| C      | 0.22464700  | -3.18029800 | 1.28909700  |
| C      | 1.48832400  | -3.64272200 | 1.26715700  |
| C      | 2.18567300  | -3.95370100 | 0.00000000  |
| C      | 1.48832400  | -3.64272200 | -1.26715700 |
| C      | 0.22464700  | -3.18029800 | -1.28909700 |
| C      | 0.28423500  | -0.38012400 | 2.77815800  |
| C      | -0.01396300 | 1.08701800  | 2.67687200  |
| C      | -1.29377000 | 1.50332100  | 2.71917800  |
| C      | -2.42372200 | 0.55301600  | 2.77766900  |
| C      | -2.11490100 | -0.89228700 | 2.69785500  |
| C      | -0.85023400 | -1.35128500 | 2.66586900  |
| C      | 1.16571300  | 2.03266500  | 2.56277800  |
| C      | -0.50601000 | -2.82354700 | 2.56701500  |
| C      | -0.50601000 | -2.82354700 | -2.56701500 |
| C      | 1.16571300  | 2.03266500  | -2.56277800 |
| O      | 1.15719300  | 0.86364900  | 0.00000000  |
| O      | 1.42596700  | -0.77749600 | 2.98169800  |
| O      | 1.42596700  | -0.77749600 | -2.98169800 |
| O      | -1.73606800 | -2.83877200 | 0.00000000  |
| O      | 3.32312500  | -4.42189200 | 0.00000000  |
| O      | -3.58615800 | 0.94852500  | -2.85491900 |
| O      | 1.11752800  | 6.18598900  | 0.00000000  |
| O      | -3.58615800 | 0.94852500  | 2.85491900  |
| H      | 1.12426800  | 4.78282000  | 2.18311100  |



|   |             |             |             |
|---|-------------|-------------|-------------|
| H | 1.12426800  | 4.78282000  | -2.18311100 |
| H | -1.55634600 | 2.55819500  | -2.69095700 |
| H | -2.96860800 | -1.56328300 | -2.65702400 |
| H | 2.05942200  | -3.79440000 | 2.17897100  |
| H | 2.05942200  | -3.79440000 | -2.17897100 |
| H | -1.55634600 | 2.55819500  | 2.69095700  |
| H | -2.96860800 | -1.56328300 | 2.65702400  |
| H | 2.08258200  | 1.43552700  | 2.59929600  |
| H | 1.17966800  | 2.71585600  | 3.41819000  |
| H | -1.43536300 | -3.39861600 | 2.62683100  |
| H | 0.12591400  | -3.10528500 | 3.41514600  |
| H | -1.43536300 | -3.39861600 | -2.62683100 |
| H | 0.12591400  | -3.10528500 | -3.41514600 |
| H | 1.17966800  | 2.71585600  | -3.41819000 |
| H | 2.08258200  | 1.43552700  | -2.59929600 |

### C4Q<sup>1-</sup>

E= -1678.48771757 hartrees

| Symbol | X           | Y           | Z           |
|--------|-------------|-------------|-------------|
| C      | 1.05795200  | 4.18067000  | 1.26710500  |
| C      | 1.10450900  | 2.83359700  | 1.28996600  |
| C      | 1.19329400  | 2.08160100  | 0.00000000  |
| C      | 1.10450900  | 2.83359700  | -1.28996600 |
| C      | 1.05795200  | 4.18067000  | -1.26710500 |
| C      | 1.05656000  | 4.94315000  | 0.00000000  |
| C      | -2.47360600 | 0.45817700  | -2.43801600 |
| C      | -1.36106100 | 1.42434500  | -2.46942600 |
| C      | -0.07322700 | 1.03582800  | -2.59736200 |
| C      | 0.24727500  | -0.40913900 | -2.79430300 |
| C      | -0.84773100 | -1.39933800 | -2.60218900 |
| C      | -2.12336100 | -0.96859900 | -2.45576200 |
| C      | -0.48110000 | -3.10086000 | 0.00000000  |
| C      | 0.28673100  | -3.15346100 | 1.26498800  |
| C      | 1.62096300  | -3.41554800 | 1.24489800  |
| C      | 2.36594300  | -3.60990300 | 0.00000000  |
| C      | 1.62096300  | -3.41554800 | -1.24489800 |
| C      | 0.28673100  | -3.15346100 | -1.26498800 |
| C      | 0.24727500  | -0.40913900 | 2.79430300  |
| C      | -0.07322700 | 1.03582800  | 2.59736200  |
| C      | -1.36106100 | 1.42434500  | 2.46942600  |
| C      | -2.47360600 | 0.45817700  | 2.43801600  |
| C      | -2.12336100 | -0.96859900 | 2.45576200  |

|   |             |             |             |
|---|-------------|-------------|-------------|
| C | -0.84773100 | -1.39933800 | 2.60218900  |
| C | 1.08928500  | 2.01148600  | 2.55592700  |
| C | -0.46509800 | -2.86289600 | 2.54906500  |
| C | -0.46509800 | -2.86289600 | -2.54906500 |
| C | 1.08928500  | 2.01148600  | -2.55592700 |
| O | 1.33635400  | 0.86105600  | 0.00000000  |
| O | 1.37999800  | -0.76570100 | 3.13251100  |
| O | 1.37999800  | -0.76570100 | -3.13251100 |
| O | -1.72453700 | -3.02714000 | 0.00000000  |
| O | 3.57994800  | -3.89892200 | 0.00000000  |
| O | -3.65044200 | 0.83769300  | -2.36756200 |
| O | 1.03233400  | 6.17468100  | 0.00000000  |
| O | -3.65044200 | 0.83769300  | 2.36756200  |
| H | 1.01138900  | 4.76774800  | 2.18099600  |
| H | 1.01138900  | 4.76774800  | -2.18099600 |
| H | -1.63310500 | 2.47178700  | -2.35795700 |
| H | -2.94448500 | -1.66979300 | -2.33744300 |
| H | 2.19359700  | -3.47285400 | 2.16711100  |
| H | 2.19359700  | -3.47285400 | -2.16711100 |
| H | -1.63310500 | 2.47178700  | 2.35795700  |
| H | -2.94448500 | -1.66979300 | 2.33744300  |
| H | 2.01410300  | 1.43077100  | 2.63469600  |
| H | 1.04941500  | 2.68831000  | 3.41661400  |
| H | -1.37512800 | -3.46854000 | 2.59984600  |
| H | 0.17148800  | -3.11476900 | 3.40298800  |
| H | -1.37512800 | -3.46854000 | -2.59984600 |
| H | 0.17148800  | -3.11476900 | -3.40298800 |
| H | 1.04941500  | 2.68831000  | -3.41661400 |
| H | 2.01410300  | 1.43077100  | -2.63469600 |

### C4Q<sup>2-</sup>

E= -1678.59845045 hartrees

| Symbol | X           | Y          | Z           |
|--------|-------------|------------|-------------|
| C      | 1.04145600  | 4.19947000 | 1.25000000  |
| C      | 1.05212400  | 2.84024800 | 1.26898700  |
| C      | 1.13771400  | 2.08651500 | 0.00000000  |
| C      | 1.05212400  | 2.84024800 | -1.26898700 |
| C      | 1.04145600  | 4.19947000 | -1.25000000 |
| C      | 1.05572700  | 4.96809000 | 0.00000000  |
| C      | -2.50128200 | 0.39461100 | -2.28988400 |
| C      | -1.41019900 | 1.37425200 | -2.36695200 |
| C      | -0.11511300 | 1.01241800 | -2.55510100 |

|   |             |             |             |
|---|-------------|-------------|-------------|
| C | 0.23578000  | -0.41046500 | -2.77271400 |
| C | -0.83039100 | -1.41445900 | -2.55243600 |
| C | -2.11555800 | -1.01491000 | -2.34156700 |
| C | -0.42276800 | -3.14668200 | 0.00000000  |
| C | 0.34861300  | -3.14186800 | 1.26134700  |
| C | 1.70072300  | -3.31315200 | 1.24149700  |
| C | 2.45871400  | -3.46239300 | 0.00000000  |
| C | 1.70072300  | -3.31315200 | -1.24149700 |
| C | 0.34861300  | -3.14186800 | -1.26134700 |
| C | 0.23578000  | -0.41046500 | 2.77271400  |
| C | -0.11511300 | 1.01241800  | 2.55510100  |
| C | -1.41019900 | 1.37425200  | 2.36695200  |
| C | -2.50128200 | 0.39461100  | 2.28988400  |
| C | -2.11555800 | -1.01491000 | 2.34156700  |
| C | -0.83039100 | -1.41445900 | 2.55243600  |
| C | 1.01649100  | 2.02388200  | 2.54151400  |
| C | -0.41910500 | -2.87148000 | 2.53887800  |
| C | -0.41910500 | -2.87148000 | -2.53887800 |
| C | 1.01649100  | 2.02388200  | -2.54151400 |
| O | 1.28075800  | 0.84921400  | 0.00000000  |
| O | 1.37215500  | -0.74559600 | 3.15407200  |
| O | 1.37215500  | -0.74559600 | -3.15407200 |
| O | -1.67097500 | -3.16977800 | 0.00000000  |
| O | 3.69025700  | -3.68139200 | 0.00000000  |
| O | -3.68923400 | 0.75126800  | -2.16300000 |
| O | 1.04161700  | 6.21367300  | 0.00000000  |
| O | -3.68923400 | 0.75126800  | 2.16300000  |
| H | 1.00070200  | 4.77663000  | 2.17170800  |
| H | 1.00070200  | 4.77663000  | -2.17170800 |
| H | -1.69145100 | 2.41726200  | -2.23265300 |
| H | -2.91045200 | -1.74298200 | -2.20525300 |
| H | 2.27273900  | -3.32585800 | 2.16572500  |
| H | 2.27273900  | -3.32585800 | -2.16572500 |
| H | -1.69145100 | 2.41726200  | 2.23265300  |
| H | -2.91045200 | -1.74298200 | 2.20525300  |
| H | 1.95151900  | 1.46441800  | 2.65788500  |
| H | 0.93254700  | 2.70573900  | 3.39685200  |
| H | -1.31295700 | -3.50129800 | 2.58754100  |
| H | 0.21796100  | -3.09403000 | 3.40063300  |
| H | -1.31295700 | -3.50129800 | -2.58754100 |
| H | 0.21796100  | -3.09403000 | -3.40063300 |
| H | 0.93254700  | 2.70573900  | -3.39685200 |
| H | 1.95151900  | 1.46441800  | -2.65788500 |

**C4Q<sup>3-</sup>**

E= -1678.70895276 hartrees

| Symbol | X           | Y           | Z           |
|--------|-------------|-------------|-------------|
| C      | 1.04862500  | 4.17801600  | 1.22730000  |
| C      | 1.10394100  | 2.80347700  | 1.24495400  |
| C      | 1.17492100  | 2.04578400  | 0.00000000  |
| C      | 1.10394100  | 2.80347700  | -1.24495400 |
| C      | 1.04862500  | 4.17801600  | -1.22730000 |
| C      | 1.03739800  | 4.95330500  | 0.00000000  |
| C      | -2.47768100 | 0.43505700  | -2.34376500 |
| C      | -1.36845800 | 1.38912000  | -2.40917600 |
| C      | -0.07317700 | 1.00864600  | -2.57735500 |
| C      | 0.25081800  | -0.42199300 | -2.80706600 |
| C      | -0.83182300 | -1.40256400 | -2.58364200 |
| C      | -2.11325400 | -0.97659200 | -2.37500700 |
| C      | -0.47950800 | -3.09522200 | 0.00000000  |
| C      | 0.29528400  | -3.13112100 | 1.25130200  |
| C      | 1.65119200  | -3.33645700 | 1.22995700  |
| C      | 2.41167000  | -3.49776600 | 0.00000000  |
| C      | 1.65119200  | -3.33645700 | -1.22995700 |
| C      | 0.29528400  | -3.13112100 | -1.25130200 |
| C      | 0.25081800  | -0.42199300 | 2.80706600  |
| C      | -0.07317700 | 1.00864600  | 2.57735500  |
| C      | -1.36845800 | 1.38912000  | 2.40917600  |
| C      | -2.47768100 | 0.43505700  | 2.34376500  |
| C      | -2.11325400 | -0.97659200 | 2.37500700  |
| C      | -0.83182300 | -1.40256400 | 2.58364200  |
| C      | 1.07670600  | 2.00014800  | 2.53215000  |
| C      | -0.45275400 | -2.86678300 | 2.54274400  |
| C      | -0.45275400 | -2.86678300 | -2.54274400 |
| C      | 1.07670600  | 2.00014800  | -2.53215000 |
| O      | 1.26745500  | 0.78238600  | 0.00000000  |
| O      | 1.37882900  | -0.77626100 | 3.20310100  |
| O      | 1.37882900  | -0.77626100 | -3.20310100 |
| O      | -1.73670100 | -3.05962300 | 0.00000000  |
| O      | 3.64609300  | -3.75182400 | 0.00000000  |
| O      | -3.66654900 | 0.81556700  | -2.24725300 |
| O      | 0.99877000  | 6.22046000  | 0.00000000  |
| O      | -3.66654900 | 0.81556700  | 2.24725300  |
| H      | 1.00034400  | 4.74101700  | 2.15985600  |
| H      | 1.00034400  | 4.74101700  | -2.15985600 |
| H      | -1.62988000 | 2.43757500  | -2.27139300 |

|   |             |             |             |
|---|-------------|-------------|-------------|
| H | -2.91856100 | -1.69266100 | -2.23515400 |
| H | 2.21348600  | -3.37611900 | 2.16049700  |
| H | 2.21348600  | -3.37611900 | -2.16049700 |
| H | -1.62988000 | 2.43757500  | 2.27139300  |
| H | -2.91856100 | -1.69266100 | 2.23515400  |
| H | 2.00035100  | 1.42276100  | 2.64779100  |
| H | 1.01626200  | 2.69152800  | 3.38361000  |
| H | -1.36086700 | -3.47724500 | 2.59272600  |
| H | 0.18819600  | -3.11893200 | 3.39439300  |
| H | -1.36086700 | -3.47724500 | -2.59272600 |
| H | 0.18819600  | -3.11893200 | -3.39439300 |
| H | 1.01626200  | 2.69152800  | -3.38361000 |
| H | 2.00035100  | 1.42276100  | -2.64779100 |

### C4Q<sup>4-</sup>

E= -1678.77409958 hartrees

| Symbol | X           | Y           | Z           |
|--------|-------------|-------------|-------------|
| C      | 1.06051300  | 4.23646000  | 1.21206800  |
| C      | 1.08314500  | 2.84397400  | 1.22492200  |
| C      | 1.15426000  | 2.08441700  | 0.00000000  |
| C      | 1.08314500  | 2.84397400  | -1.22492200 |
| C      | 1.06051300  | 4.23646000  | -1.21206800 |
| C      | 1.06559200  | 5.02573900  | 0.00000000  |
| C      | -2.48265100 | 0.43191000  | -2.32506700 |
| C      | -1.38063100 | 1.38755900  | -2.38654100 |
| C      | -0.07705400 | 1.01274300  | -2.54165000 |
| C      | 0.25849400  | -0.40860000 | -2.77572000 |
| C      | -0.81801900 | -1.39672300 | -2.54673000 |
| C      | -2.10406300 | -0.97602900 | -2.34431600 |
| C      | -0.48387600 | -3.15578400 | 0.00000000  |
| C      | 0.29542100  | -3.17537000 | 1.23852700  |
| C      | 1.65726900  | -3.40088100 | 1.21863900  |
| C      | 2.41970500  | -3.58189400 | 0.00000000  |
| C      | 1.65726900  | -3.40088100 | -1.21863900 |
| C      | 0.29542100  | -3.17537000 | -1.23852700 |
| C      | 0.25849400  | -0.40860000 | 2.77572000  |
| C      | -0.07705400 | 1.01274300  | 2.54165000  |
| C      | -1.38063100 | 1.38755900  | 2.38654100  |
| C      | -2.48265100 | 0.43191000  | 2.32506700  |
| C      | -2.10406300 | -0.97602900 | 2.34431600  |
| C      | -0.81801900 | -1.39672300 | 2.54673000  |
| C      | 1.04947300  | 2.03318300  | 2.51138800  |

|   |             |             |             |
|---|-------------|-------------|-------------|
| C | -0.44060100 | -2.86415300 | 2.52790600  |
| C | -0.44060100 | -2.86415300 | -2.52790600 |
| C | 1.04947300  | 2.03318300  | -2.51138800 |
| O | 1.25324100  | 0.80242600  | 0.00000000  |
| O | 1.38435500  | -0.76089500 | 3.19233200  |
| O | 1.38435500  | -0.76089500 | -3.19233200 |
| O | -1.75227000 | -3.13180300 | 0.00000000  |
| O | 3.66149800  | -3.85383300 | 0.00000000  |
| O | -3.68055400 | 0.80038700  | -2.24526800 |
| O | 1.04280200  | 6.30658600  | 0.00000000  |
| O | -3.68055400 | 0.80038700  | 2.24526800  |
| H | 1.01709400  | 4.78722900  | 2.15506900  |
| H | 1.01709400  | 4.78722900  | -2.15506900 |
| H | -1.64535100 | 2.43686200  | -2.25815600 |
| H | -2.90410500 | -1.69858400 | -2.20448200 |
| H | 2.21552800  | -3.42671700 | 2.15382200  |
| H | 2.21552800  | -3.42671700 | -2.15382200 |
| H | -1.64535100 | 2.43686200  | 2.25815600  |
| H | -2.90410500 | -1.69858400 | 2.20448200  |
| H | 1.98225800  | 1.47265500  | 2.64784900  |
| H | 0.95628900  | 2.71975500  | 3.36622900  |
| H | -1.35252800 | -3.46785900 | 2.60390600  |
| H | 0.20449900  | -3.09464600 | 3.38350600  |
| H | -1.35252800 | -3.46785900 | -2.60390600 |
| H | 0.20449900  | -3.09464600 | -3.38350600 |
| H | 0.95628900  | 2.71975500  | -3.36622900 |
| H | 1.98225800  | 1.47265500  | -2.64784900 |

### C4Q<sup>5-</sup>

E= -1678.86807324 hartrees

| Symbol | X           | Y           | Z           |
|--------|-------------|-------------|-------------|
| C      | 1.09027700  | 4.13518700  | 1.19935600  |
| C      | 1.15464400  | 2.73066400  | 1.21758400  |
| C      | 1.21039200  | 1.95836900  | 0.00000000  |
| C      | 1.15464400  | 2.73066400  | -1.21758400 |
| C      | 1.09027700  | 4.13518700  | -1.19935600 |
| C      | 1.06691000  | 4.93378500  | 0.00000000  |
| C      | -2.43646100 | 0.56689700  | -2.72350600 |
| C      | -1.28387900 | 1.44739200  | -2.70043000 |
| C      | 0.01705700  | 0.99708900  | -2.72292300 |
| C      | 0.29625100  | -0.42934200 | -2.91481300 |
| C      | -0.83489600 | -1.33760200 | -2.71958700 |

|   |             |             |             |
|---|-------------|-------------|-------------|
| C | -2.12133200 | -0.84559400 | -2.66368700 |
| C | -0.59107300 | -3.03486300 | 0.00000000  |
| C | 0.17334700  | -3.12810100 | 1.24665300  |
| C | 1.50885100  | -3.45988100 | 1.22292800  |
| C | 2.25280700  | -3.68218800 | 0.00000000  |
| C | 1.50885100  | -3.45988100 | -1.22292800 |
| C | 0.17334700  | -3.12810100 | -1.24665300 |
| C | 0.29625100  | -0.42934200 | 2.91481300  |
| C | 0.01705700  | 0.99708900  | 2.72292300  |
| C | -1.28387900 | 1.44739200  | 2.70043000  |
| C | -2.43646100 | 0.56689700  | 2.72350600  |
| C | -2.12133200 | -0.84559400 | 2.66368700  |
| C | -0.83489600 | -1.33760200 | 2.71958700  |
| C | 1.19071200  | 1.95090700  | 2.52874700  |
| C | -0.54081100 | -2.82163300 | 2.55622500  |
| C | -0.54081100 | -2.82163300 | -2.55622500 |
| C | 1.19071200  | 1.95090700  | -2.52874700 |
| O | 1.30325800  | 0.66959300  | 0.00000000  |
| O | 1.44236100  | -0.85811200 | 3.24560200  |
| O | 1.44236100  | -0.85811200 | -3.24560200 |
| O | -1.85021600 | -2.89610900 | 0.00000000  |
| O | 3.47801500  | -4.02085200 | 0.00000000  |
| O | -3.63272100 | 1.00011200  | -2.74129800 |
| O | 1.02224700  | 6.22658800  | 0.00000000  |
| O | -3.63272100 | 1.00011200  | 2.74129800  |
| H | 1.06186900  | 4.67968500  | 2.15014600  |
| H | 1.06186900  | 4.67968500  | -2.15014600 |
| H | -1.49097800 | 2.51396800  | -2.59300300 |
| H | -2.96267600 | -1.52861100 | -2.54643000 |
| H | 2.06714900  | -3.53111900 | 2.15530500  |
| H | 2.06714900  | -3.53111900 | -2.15530500 |
| H | -1.49097800 | 2.51396800  | 2.59300300  |
| H | -2.96267600 | -1.52861100 | 2.54643000  |
| H | 2.09198100  | 1.32742100  | 2.58205600  |
| H | 1.24086200  | 2.66534500  | 3.36734000  |
| H | -1.48809300 | -3.37366600 | 2.59426300  |
| H | 0.08987400  | -3.16711800 | 3.38517800  |
| H | -1.48809300 | -3.37366600 | -2.59426300 |
| H | 0.08987400  | -3.16711800 | -3.38517800 |
| H | 1.24086200  | 2.66534500  | -3.36734000 |
| H | 2.09198100  | 1.32742100  | -2.58205600 |

**C4Q<sup>6-</sup>**

E= -1678.90349737 hartrees

| Symbol | X           | Y           | Z           |
|--------|-------------|-------------|-------------|
| C      | 1.05965800  | 4.10616700  | 1.20492000  |
| C      | 1.21126800  | 2.71247500  | 1.22533600  |
| C      | 1.36660400  | 1.95992100  | 0.00000000  |
| C      | 1.21126800  | 2.71247500  | -1.22533600 |
| C      | 1.05965800  | 4.10616700  | -1.20492000 |
| C      | 0.98876500  | 4.89757700  | 0.00000000  |
| C      | -2.43236800 | 0.59442600  | -2.66735200 |
| C      | -1.25748700 | 1.44392500  | -2.64846900 |
| C      | 0.04434500  | 0.96989900  | -2.71007300 |
| C      | 0.31570300  | -0.45102600 | -2.90666800 |
| C      | -0.83163300 | -1.32941500 | -2.71448800 |
| C      | -2.12436700 | -0.81148800 | -2.63634300 |
| C      | -0.67061700 | -3.01935500 | 0.00000000  |
| C      | 0.10278600  | -3.12607700 | 1.23699600  |
| C      | 1.45449100  | -3.44816700 | 1.21124800  |
| C      | 2.21218400  | -3.65518800 | 0.00000000  |
| C      | 1.45449100  | -3.44816700 | -1.21124800 |
| C      | 0.10278600  | -3.12607700 | -1.23699600 |
| C      | 0.31570300  | -0.45102600 | 2.90666800  |
| C      | 0.04434500  | 0.96989900  | 2.71007300  |
| C      | -1.25748700 | 1.44392500  | 2.64846900  |
| C      | -2.43236800 | 0.59442600  | 2.66735200  |
| C      | -2.12436700 | -0.81148800 | 2.63634300  |
| C      | -0.83163300 | -1.32941500 | 2.71448800  |
| C      | 1.23402000  | 1.91563900  | 2.52482500  |
| C      | -0.58519000 | -2.82215500 | 2.55924700  |
| C      | -0.58519000 | -2.82215500 | -2.55924700 |
| C      | 1.23402000  | 1.91563900  | -2.52482500 |
| O      | 1.61763800  | 0.69916100  | 0.00000000  |
| O      | 1.47302100  | -0.88922600 | 3.23192200  |
| O      | 1.47302100  | -0.88922600 | -3.23192200 |
| O      | -1.93616100 | -2.87229100 | 0.00000000  |
| O      | 3.44771300  | -3.99164000 | 0.00000000  |
| O      | -3.62773000 | 1.05908200  | -2.67019400 |
| O      | 0.84891200  | 6.18115100  | 0.00000000  |
| O      | -3.62773000 | 1.05908200  | 2.67019400  |
| H      | 0.96938000  | 4.65161500  | 2.15113700  |
| H      | 0.96938000  | 4.65161500  | -2.15113700 |
| H      | -1.43638100 | 2.51565300  | -2.52366800 |
| H      | -2.96844800 | -1.49518500 | -2.52922500 |
| H      | 2.00191900  | -3.52167000 | 2.15122300  |



|   |             |             |             |
|---|-------------|-------------|-------------|
| H | 2.00191900  | -3.52167000 | -2.15122300 |
| H | -1.43638100 | 2.51565300  | 2.52366800  |
| H | -2.96844800 | -1.49518500 | 2.52922500  |
| H | 2.11982900  | 1.27001700  | 2.56410000  |
| H | 1.30192100  | 2.62074600  | 3.37258200  |
| H | -1.54857200 | -3.34845000 | 2.61184400  |
| H | 0.04745400  | -3.19119400 | 3.37969800  |
| H | -1.54857200 | -3.34845000 | -2.61184400 |
| H | 0.04745400  | -3.19119400 | -3.37969800 |
| H | 1.30192100  | 2.62074600  | -3.37258200 |
| H | 2.11982900  | 1.27001700  | -2.56410000 |

### C4Q<sup>7-</sup>

E= -1678.94791468 hartrees

| Symbol | X           | Y           | Z           |
|--------|-------------|-------------|-------------|
| C      | 1.06660500  | 4.04501200  | 1.19640700  |
| C      | 1.31268000  | 2.65601900  | 1.22047700  |
| C      | 1.50400800  | 1.90170700  | 0.00000000  |
| C      | 1.31268000  | 2.65601900  | -1.22047700 |
| C      | 1.06660500  | 4.04501200  | -1.19640700 |
| C      | 0.94827300  | 4.83790400  | 0.00000000  |
| C      | -2.35917100 | 0.74053800  | -2.88337100 |
| C      | -1.14816200 | 1.51948700  | -2.80448700 |
| C      | 0.14263800  | 0.98197100  | -2.79489800 |
| C      | 0.35833400  | -0.44874300 | -2.96059000 |
| C      | -0.83537400 | -1.25837100 | -2.78509500 |
| C      | -2.11130900 | -0.67276900 | -2.79881700 |
| C      | -0.81008900 | -2.98816300 | 0.00000000  |
| C      | -0.04347400 | -3.13509700 | 1.23448100  |
| C      | 1.27617400  | -3.58250100 | 1.20498000  |
| C      | 2.00473900  | -3.88692900 | 0.00000000  |
| C      | 1.27617400  | -3.58250100 | -1.20498000 |
| C      | -0.04347400 | -3.13509700 | -1.23448100 |
| C      | 0.35833400  | -0.44874300 | 2.96059000  |
| C      | 0.14263800  | 0.98197100  | 2.79489800  |
| C      | -1.14816200 | 1.51948700  | 2.80448700  |
| C      | -2.35917100 | 0.74053800  | 2.88337100  |
| C      | -2.11130900 | -0.67276900 | 2.79881700  |
| C      | -0.83537400 | -1.25837100 | 2.78509500  |
| C      | 1.36336400  | 1.87246700  | 2.53140600  |
| C      | -0.68580600 | -2.76274900 | 2.56942500  |
| C      | -0.68580600 | -2.76274900 | -2.56942500 |

|   |             |             |             |
|---|-------------|-------------|-------------|
| C | 1.36336400  | 1.87246700  | -2.53140600 |
| O | 1.81127200  | 0.64991500  | 0.00000000  |
| O | 1.51167500  | -0.94787000 | 3.24329200  |
| O | 1.51167500  | -0.94787000 | -3.24329200 |
| O | -2.06642000 | -2.73767700 | 0.00000000  |
| O | 3.19777700  | -4.37097800 | 0.00000000  |
| O | -3.53922300 | 1.26043600  | -2.97696900 |
| O | 0.75029800  | 6.12255700  | 0.00000000  |
| O | -3.53922300 | 1.26043600  | 2.97696900  |
| H | 0.95817900  | 4.58340200  | 2.14750400  |
| H | 0.95817900  | 4.58340200  | -2.14750400 |
| H | -1.27350000 | 2.60360900  | -2.70772500 |
| H | -2.99114300 | -1.31733700 | -2.70862900 |
| H | 1.81695700  | -3.69485500 | 2.14642700  |
| H | 1.81695700  | -3.69485500 | -2.14642700 |
| H | -1.27350000 | 2.60360900  | 2.70772500  |
| H | -2.99114300 | -1.31733700 | 2.70862900  |
| H | 2.21446100  | 1.18101500  | 2.52284300  |
| H | 1.51712300  | 2.58263900  | 3.36749400  |
| H | -1.68303700 | -3.22379500 | 2.63445400  |
| H | -0.07015600 | -3.19561300 | 3.37387500  |
| H | -1.68303700 | -3.22379500 | -2.63445400 |
| H | -0.07015600 | -3.19561300 | -3.37387500 |
| H | 1.51712300  | 2.58263900  | -3.36749400 |
| H | 2.21446100  | 1.18101500  | -2.52284300 |

### C4Q<sup>8-</sup>

E= -1678.96916033 hartrees

| Symbol | X           | Y           | Z           |
|--------|-------------|-------------|-------------|
| C      | 1.14348400  | 4.15433300  | 1.19509800  |
| C      | 1.10108900  | 2.74313700  | 1.22478100  |
| C      | 1.08402200  | 1.96458500  | 0.00000000  |
| C      | 1.10108900  | 2.74313700  | -1.22478100 |
| C      | 1.14348400  | 4.15433300  | -1.19509800 |
| C      | 1.15832400  | 4.95642700  | 0.00000000  |
| C      | -2.41175100 | 0.61079300  | -3.20440500 |
| C      | -1.27015600 | 1.47085100  | -3.03672300 |
| C      | 0.05575900  | 1.02079400  | -2.90847900 |
| C      | 0.40038200  | -0.38396100 | -3.04012600 |
| C      | -0.73622100 | -1.27425600 | -2.94167600 |
| C      | -2.05367900 | -0.77614000 | -3.08418800 |
| C      | -0.69868500 | -2.94939900 | 0.00000000  |

|   |             |             |             |
|---|-------------|-------------|-------------|
| C | 0.07785000  | -3.11427900 | 1.22423300  |
| C | 1.37421800  | -3.67051000 | 1.18822600  |
| C | 2.08947100  | -4.03743800 | 0.00000000  |
| C | 1.37421800  | -3.67051000 | -1.18822600 |
| C | 0.07785000  | -3.11427900 | -1.22423300 |
| C | 0.40038200  | -0.38396100 | 3.04012600  |
| C | 0.05575900  | 1.02079400  | 2.90847900  |
| C | -1.27015600 | 1.47085100  | 3.03672300  |
| C | -2.41175100 | 0.61079300  | 3.20440500  |
| C | -2.05367900 | -0.77614000 | 3.08418800  |
| C | -0.73622100 | -1.27425600 | 2.94167600  |
| C | 1.19305400  | 1.98382800  | 2.55531800  |
| C | -0.52779600 | -2.75956700 | 2.59827400  |
| C | -0.52779600 | -2.75956700 | -2.59827400 |
| C | 1.19305400  | 1.98382800  | -2.55531800 |
| O | 1.08584600  | 0.68026100  | 0.00000000  |
| O | 1.61956000  | -0.79078900 | 3.19828100  |
| O | 1.61956000  | -0.79078900 | -3.19828100 |
| O | -1.96350200 | -2.66849900 | 0.00000000  |
| O | 3.25970000  | -4.61041000 | 0.00000000  |
| O | -3.62593100 | 1.04206300  | -3.39055800 |
| O | 1.19772400  | 6.25738900  | 0.00000000  |
| O | -3.62593100 | 1.04206300  | 3.39055800  |
| H | 1.18087600  | 4.70168400  | 2.14729700  |
| H | 1.18087600  | 4.70168400  | -2.14729700 |
| H | -1.47480800 | 2.54761400  | -2.95944200 |
| H | -2.88740800 | -1.48925000 | -3.04231700 |
| H | 1.90032400  | -3.82799500 | 2.13763100  |
| H | 1.90032400  | -3.82799500 | -2.13763100 |
| H | -1.47480800 | 2.54761400  | 2.95944200  |
| H | -2.88740800 | -1.48925000 | 3.04231700  |
| H | 2.08252600  | 1.33658200  | 2.56078200  |
| H | 1.34343900  | 2.73321200  | 3.35915100  |
| H | -1.51136600 | -3.25304900 | 2.68527800  |
| H | 0.12152300  | -3.22662300 | 3.36015400  |
| H | -1.51136600 | -3.25304900 | -2.68527800 |
| H | 0.12152300  | -3.22662300 | -3.36015400 |
| H | 1.34343900  | 2.73321200  | -3.35915100 |
| H | 2.08252600  | 1.33658200  | -2.56078200 |

**C4Q<sup>9</sup>**

E= -1678.90943820 hartrees

| Symbol | X           | Y           | Z           |
|--------|-------------|-------------|-------------|
| C      | 0.90762900  | 3.87621300  | 1.20212800  |
| C      | 1.57090600  | 2.58035000  | 1.23644100  |
| C      | 2.02130200  | 1.95268200  | 0.00000000  |
| C      | 1.57090600  | 2.58035000  | -1.23644100 |
| C      | 0.90762900  | 3.87621300  | -1.20212800 |
| C      | 0.60616000  | 4.60753200  | 0.00000000  |
| C      | -2.14255200 | 0.99040700  | -3.36446700 |
| C      | -0.87189400 | 1.65184700  | -3.21700200 |
| C      | 0.36272900  | 1.00422800  | -2.95269300 |
| C      | 0.43489800  | -0.45535200 | -3.00657400 |
| C      | -0.84246500 | -1.12228900 | -2.88646000 |
| C      | -2.05465700 | -0.41897200 | -3.11431200 |
| C      | -1.01870400 | -2.74755100 | 0.00000000  |
| C      | -0.31730700 | -3.09529100 | 1.22228100  |
| C      | 0.82327500  | -3.92439100 | 1.19080900  |
| C      | 1.43978300  | -4.43854900 | 0.00000000  |
| C      | 0.82327500  | -3.92439100 | -1.19080900 |
| C      | -0.31730700 | -3.09529100 | -1.22228100 |
| C      | 0.43489800  | -0.45535200 | 3.00657400  |
| C      | 0.36272900  | 1.00422800  | 2.95269300  |
| C      | -0.87189400 | 1.65184700  | 3.21700200  |
| C      | -2.14255200 | 0.99040700  | 3.36446700  |
| C      | -2.05465700 | -0.41897200 | 3.11431200  |
| C      | -0.84246500 | -1.12228900 | 2.88646000  |
| C      | 1.63451500  | 1.78782000  | 2.54799100  |
| C      | -0.88318400 | -2.62379200 | 2.57029000  |
| C      | -0.88318400 | -2.62379200 | -2.57029000 |
| C      | 1.63451500  | 1.78782000  | -2.54799100 |
| O      | 2.77836500  | 0.89446500  | 0.00000000  |
| O      | 1.54894200  | -1.10667200 | 3.14511700  |
| O      | 1.54894200  | -1.10667200 | -3.14511700 |
| O      | -2.19554600 | -2.20652100 | 0.00000000  |
| O      | 2.45487400  | -5.25669900 | 0.00000000  |
| O      | -3.24965000 | 1.61092900  | -3.66665800 |
| O      | 0.10099400  | 5.81539400  | 0.00000000  |
| O      | -3.24965000 | 1.61092900  | 3.66665800  |
| H      | 0.72117900  | 4.40447100  | 2.15224000  |
| H      | 0.72117900  | 4.40447100  | -2.15224000 |
| H      | -0.90498200 | 2.74759500  | -3.25455100 |
| H      | -3.00220400 | -0.97414800 | -3.07669100 |
| H      | 1.29560500  | -4.20455700 | 2.14070300  |
| H      | 1.29560500  | -4.20455700 | -2.14070300 |
| H      | -0.90498200 | 2.74759500  | 3.25455100  |

|   |             |             |             |
|---|-------------|-------------|-------------|
| H | -3.00220400 | -0.97414800 | 3.07669100  |
| H | 2.41467800  | 1.02420300  | 2.45119400  |
| H | 1.94099600  | 2.47616100  | 3.38948300  |
| H | -1.94137400 | -2.93640900 | 2.62692100  |
| H | -0.34996400 | -3.18493400 | 3.36126000  |
| H | -1.94137400 | -2.93640900 | -2.62692100 |
| H | -0.34996400 | -3.18493400 | -3.36126000 |
| H | 1.94099600  | 2.47616100  | -3.38948300 |
| H | 2.41467800  | 1.02420300  | -2.45119400 |

### C4QLi<sub>1</sub> (by condensed Fukui function)

E= -1686.127594 hartrees

| Symbol | X           | Y           | Z           |
|--------|-------------|-------------|-------------|
| C      | -4.24635100 | 1.27014400  | -1.11311300 |
| C      | -2.89964100 | 1.29262800  | -1.17287100 |
| C      | -2.16113200 | -0.00006100 | -1.34458000 |
| C      | -2.89930900 | -1.29293900 | -1.17287100 |
| C      | -4.24603000 | -1.27076300 | -1.11312200 |
| C      | -5.00486600 | -0.00041000 | -1.14348600 |
| C      | -0.43857500 | -1.92920000 | 2.37126100  |
| C      | -1.41983100 | -2.12605800 | 1.31762800  |
| C      | -1.05723900 | -2.47312600 | 0.05262300  |
| C      | 0.36933600  | -2.74920600 | -0.25612300 |
| C      | 1.37418200  | -2.48044100 | 0.80254600  |
| C      | 0.96445000  | -2.13070500 | 2.05306000  |
| C      | 3.25818500  | 0.00014900  | 0.43253000  |
| C      | 3.22831800  | 1.28808200  | -0.33195400 |
| C      | 3.53619500  | 1.26654800  | -1.64554000 |
| C      | 3.79454600  | -0.00013800 | -2.36206900 |
| C      | 3.53643300  | -1.26668300 | -1.64523800 |
| C      | 3.22853900  | -1.28796800 | -0.33164500 |
| C      | 0.36886100  | 2.74934200  | -0.25638600 |
| C      | -1.05775400 | 2.47315600  | 0.05248600  |
| C      | -1.42016400 | 2.12621800  | 1.31751700  |
| C      | -0.43869500 | 1.92945500  | 2.37105400  |
| C      | 0.96436800  | 2.13104100  | 2.05273400  |
| C      | 1.37394300  | 2.48064200  | 0.80219800  |
| C      | -2.06490100 | 2.54791400  | -1.08202700 |
| C      | 2.84268300  | 2.54343700  | 0.42502200  |
| C      | 2.84299700  | -2.54317900 | 0.42559600  |
| C      | -2.06429400 | -2.54802900 | -1.08198200 |
| O      | -0.96449400 | 0.00011900  | -1.62012400 |

|    |             |             |             |
|----|-------------|-------------|-------------|
| O  | 0.71016300  | 3.20458000  | -1.36117800 |
| O  | 0.71082400  | -3.20439100 | -1.36097500 |
| O  | 3.33294200  | 0.00031700  | 1.66028400  |
| O  | 4.16441400  | -0.00023000 | -3.54194600 |
| O  | -0.79416500 | -1.53697400 | 3.52219100  |
| O  | -6.23932000 | -0.00055900 | -1.14571700 |
| O  | -0.79409400 | 1.53721400  | 3.52192200  |
| H  | -4.83192300 | 2.18230900  | -1.02288800 |
| H  | -4.83138000 | -2.18307000 | -1.02289200 |
| H  | -2.45835700 | -1.92790000 | 1.57381800  |
| H  | 1.68303300  | -1.94051200 | 2.84542400  |
| H  | 3.58581000  | 2.17737900  | -2.23692200 |
| H  | 3.58620100  | -2.17764900 | -2.23639700 |
| H  | -2.45863100 | 1.92801400  | 1.57389800  |
| H  | 1.68299000  | 1.94094000  | 2.84507900  |
| H  | -1.51561200 | 2.70217100  | -2.01653400 |
| H  | -2.73206700 | 3.40730700  | -0.94715100 |
| H  | 3.44289000  | 2.62845500  | 1.33628100  |
| H  | 3.03802700  | 3.41338700  | -0.20774000 |
| H  | 3.44310600  | -2.62788700 | 1.33695000  |
| H  | 3.03854600  | -3.41325700 | -0.20693000 |
| H  | -2.73129800 | -3.40757500 | -0.94726000 |
| H  | -1.51485300 | -2.70211100 | -2.01643200 |
| Li | -1.00738500 | 0.00009700  | 4.47152000  |

### C4QLi<sub>2</sub> (by condensed Fukui function)

E= -1693.744103 hartrees

| Symbol | X           | Y           | Z           |
|--------|-------------|-------------|-------------|
| C      | -4.13099200 | 1.35425900  | -0.59656500 |
| C      | -2.80945300 | 1.34965000  | -0.86486700 |
| C      | -2.17302400 | 0.05615000  | -1.27045200 |
| C      | -2.87836300 | -1.22349700 | -0.95293700 |
| C      | -4.19884500 | -1.17462800 | -0.67689900 |
| C      | -4.92746500 | 0.10689200  | -0.57768000 |
| C      | -0.07715500 | -2.13174900 | 2.35546100  |
| C      | -1.15046800 | -2.24798700 | 1.40246700  |
| C      | -0.91840800 | -2.42626900 | 0.05702100  |
| C      | 0.44246000  | -2.50914100 | -0.45035000 |
| C      | 1.52939200  | -2.50614300 | 0.51678900  |
| C      | 1.25328800  | -2.31417900 | 1.86152000  |
| C      | 3.35303700  | -0.00928400 | 0.13677900  |
| C      | 3.11839800  | 1.30848500  | -0.53373700 |

|    |             |             |             |
|----|-------------|-------------|-------------|
| C  | 2.81897200  | 1.35361200  | -1.85998500 |
| C  | 2.57615600  | 0.12169500  | -2.60309100 |
| C  | 2.99045000  | -1.13754700 | -2.01438600 |
| C  | 3.19429100  | -1.24147100 | -0.67182500 |
| C  | 0.49863400  | 2.85217700  | -0.02120900 |
| C  | -0.88529800 | 2.42919000  | 0.31364400  |
| C  | -1.14555500 | 1.92167100  | 1.54674800  |
| C  | -0.08498400 | 1.69063900  | 2.52559000  |
| C  | 1.28911300  | 1.96718700  | 2.13684300  |
| C  | 1.59420000  | 2.47068000  | 0.90907000  |
| C  | -1.93782200 | 2.57485700  | -0.77412000 |
| C  | 3.00730900  | 2.52784200  | 0.36355900  |
| C  | 2.97583900  | -2.55864200 | 0.03294900  |
| C  | -2.06849500 | -2.49359000 | -0.94161600 |
| O  | -1.09173000 | 0.05561400  | -1.87365300 |
| O  | 0.73015400  | 3.49955700  | -1.05263600 |
| O  | 0.65724900  | -2.56077700 | -1.72021600 |
| O  | 3.68070700  | -0.06011900 | 1.33097900  |
| O  | 1.84291900  | 0.11146500  | -3.63458900 |
| O  | -0.31557000 | -1.86831900 | 3.59831900  |
| O  | -6.15025100 | 0.13685300  | -0.41841700 |
| O  | -0.35630700 | 1.20483200  | 3.65815400  |
| H  | -4.65955500 | 2.27390400  | -0.35685900 |
| H  | -4.77448700 | -2.07897000 | -0.49348200 |
| H  | -2.16734700 | -2.15747300 | 1.78102400  |
| H  | 2.06795700  | -2.26694000 | 2.58012900  |
| H  | 2.57508100  | 2.29119600  | -2.35081200 |
| H  | 2.87952400  | -2.02516400 | -2.62702300 |
| H  | -2.14952000 | 1.62478800  | 1.84100500  |
| H  | 2.06802800  | 1.69705500  | 2.84414300  |
| H  | -1.42565700 | 2.75569100  | -1.72384900 |
| H  | -2.57094500 | 3.44839300  | -0.57806000 |
| H  | 3.72993400  | 2.48270500  | 1.18141000  |
| H  | 3.16791700  | 3.43966500  | -0.21734600 |
| H  | 3.64462500  | -2.68887300 | 0.88787700  |
| H  | 3.13164500  | -3.38416900 | -0.66951900 |
| H  | -2.73814800 | -3.32439700 | -0.69349300 |
| H  | -1.65772900 | -2.69342900 | -1.93689600 |
| Li | -0.53398000 | -0.37918800 | 4.55753200  |
| Li | 0.32399700  | -1.02481400 | -2.77890000 |

### C4QLi<sub>3</sub> (by condensed Fukui function)

E= -1701.357884 hartrees

| Symbol | X           | Y           | Z           |
|--------|-------------|-------------|-------------|
| C      | -4.32615500 | 0.50116200  | -0.85666700 |
| C      | -3.02441600 | 0.65283100  | -1.17884900 |
| C      | -2.14981300 | -0.56567900 | -1.17536000 |
| C      | -2.60137200 | -1.77501100 | -0.42016500 |
| C      | -3.90591800 | -1.87216800 | -0.08823600 |
| C      | -4.86669500 | -0.78471300 | -0.36998800 |
| C      | 0.57451800  | -1.32118300 | 2.70504400  |
| C      | -0.55673500 | -1.73712600 | 1.93129300  |
| C      | -0.39442200 | -2.36109000 | 0.70916800  |
| C      | 0.93666100  | -2.54662000 | 0.14449100  |
| C      | 2.06190200  | -2.28647900 | 1.00616500  |
| C      | 1.84403100  | -1.76776200 | 2.28335200  |
| C      | 3.11035800  | 0.33688100  | 0.07352300  |
| C      | 2.74907100  | 1.43023900  | -0.86751300 |
| C      | 2.52471400  | 1.13919800  | -2.17765200 |
| C      | 2.51149800  | -0.24788800 | -2.63509500 |
| C      | 3.15448100  | -1.23894600 | -1.80452100 |
| C      | 3.36718400  | -1.00804700 | -0.47121700 |
| C      | -0.05130800 | 2.75366100  | -0.85004800 |
| C      | -1.39018100 | 2.36132500  | -0.41549300 |
| C      | -1.68345500 | 2.26825300  | 0.92444200  |
| C      | -0.68588100 | 2.46360000  | 1.94433000  |
| C      | 0.66003100  | 2.72144100  | 1.50728600  |
| C      | 0.99593300  | 2.80101900  | 0.17279700  |
| C      | -2.39957000 | 1.98674100  | -1.49477500 |
| C      | 2.43952100  | 2.80900800  | -0.30228200 |
| C      | 3.47305900  | -2.20659100 | 0.45059500  |
| C      | -1.58610600 | -2.84202500 | -0.11092300 |
| O      | -1.08634400 | -0.57848200 | -1.80878600 |
| O      | 0.19493000  | 3.02173900  | -2.05969000 |
| O      | 1.07848100  | -2.88621800 | -1.09822900 |
| O      | 3.17837500  | 0.57789300  | 1.30982400  |
| O      | 1.81693100  | -0.60098200 | -3.63339200 |
| O      | 0.49525100  | -0.44604100 | 3.69814100  |
| O      | -6.07171700 | -0.92746100 | -0.14522400 |
| O      | -0.97271600 | 2.31748800  | 3.19600000  |
| H      | -5.02167800 | 1.33605700  | -0.89963200 |
| H      | -4.30292200 | -2.75656500 | 0.40478500  |
| H      | -1.55389800 | -1.51144300 | 2.30729200  |
| H      | 2.70255000  | -1.56655000 | 2.92368500  |
| H      | 2.17073300  | 1.90122100  | -2.86359300 |
| H      | 3.27165500  | -2.23495000 | -2.21661200 |



|    |             |             |             |
|----|-------------|-------------|-------------|
| H  | -2.67939100 | 1.98394000  | 1.25851000  |
| H  | 1.42674200  | 2.84442700  | 2.27454800  |
| H  | -1.87199300 | 1.95821500  | -2.45293700 |
| H  | -3.19376900 | 2.73839100  | -1.57606400 |
| H  | 3.10623500  | 3.04530800  | 0.53122900  |
| H  | 2.57755000  | 3.55505800  | -1.09067000 |
| H  | 4.19165600  | -2.06655200 | 1.26337500  |
| H  | 3.76186700  | -3.08749500 | -0.13022500 |
| H  | -2.09636800 | -3.65243500 | 0.42304900  |
| H  | -1.20408400 | -3.26958900 | -1.04456400 |
| Li | -0.75397800 | 0.80333700  | 4.16462600  |
| Li | 0.48162500  | -1.69311200 | -2.44050700 |
| Li | 1.92701500  | 0.54820700  | 2.74803500  |

### C4QLi<sub>4</sub> (by condensed Fukui function)

E= -1708.977769 hartrees

| Symbol | X           | Y           | Z           |
|--------|-------------|-------------|-------------|
| C      | -4.29867000 | 0.41473500  | -0.83629800 |
| C      | -2.99464100 | 0.45262200  | -1.19934000 |
| C      | -2.16084700 | -0.76365900 | -0.96451200 |
| C      | -2.64897400 | -1.77356100 | 0.01840900  |
| C      | -3.95880400 | -1.77094200 | 0.35294500  |
| C      | -4.88786500 | -0.73444800 | -0.13125600 |
| C      | 0.47026000  | -0.51768100 | 2.88701700  |
| C      | -0.65735200 | -1.13326100 | 2.25890900  |
| C      | -0.49049700 | -2.12592500 | 1.30682300  |
| C      | 0.83487400  | -2.53291900 | 0.88495700  |
| C      | 1.95391000  | -2.00784500 | 1.61966100  |
| C      | 1.73442900  | -1.09658900 | 2.65552300  |
| C      | 3.14231200  | 0.24558300  | 0.00852000  |
| C      | 2.88151900  | 1.05137500  | -1.18868000 |
| C      | 2.61757600  | 0.42182400  | -2.38052500 |
| C      | 2.36854900  | -0.99421500 | -2.39247800 |
| C      | 2.97543500  | -1.78960100 | -1.36645300 |
| C      | 3.28161300  | -1.21558000 | -0.15199700 |
| C      | 0.08934100  | 2.19955100  | -1.41396500 |
| C      | -1.25518800 | 2.22127300  | -0.88211700 |
| C      | -1.50197900 | 2.68156300  | 0.39840200  |
| C      | -0.44991800 | 3.10738900  | 1.27312000  |
| C      | 0.87437600  | 3.09063800  | 0.73463800  |
| C      | 1.15983200  | 2.65570300  | -0.56354600 |
| C      | -2.37299700 | 1.69685100  | -1.77681900 |

|    |             |             |             |
|----|-------------|-------------|-------------|
| C  | 2.59922500  | 2.53442700  | -1.05118300 |
| C  | 3.36515600  | -2.11979300 | 1.06345000  |
| C  | -1.67852300 | -2.76562300 | 0.60163900  |
| O  | -1.08867400 | -0.95706700 | -1.58812600 |
| O  | 0.30093200  | 1.75872900  | -2.61768000 |
| O  | 0.98454500  | -3.29030300 | -0.16396100 |
| O  | 3.23740800  | 0.80072900  | 1.14777200  |
| O  | 1.45668300  | -1.49228000 | -3.17138100 |
| O  | 0.39648800  | 0.64038500  | 3.53295900  |
| O  | -6.09994200 | -0.79499400 | 0.10603000  |
| O  | -0.69695900 | 3.46525100  | 2.50640900  |
| H  | -4.95885300 | 1.25506400  | -1.03710800 |
| H  | -4.36924500 | -2.52546900 | 1.01982000  |
| H  | -1.65063400 | -0.75438500 | 2.49558600  |
| H  | 2.59108300  | -0.69825500 | 3.19617200  |
| H  | 2.38197000  | 0.99615100  | -3.26786600 |
| H  | 2.97622000  | -2.86796000 | -1.47773500 |
| H  | -2.51835000 | 2.69588100  | 0.79037600  |
| H  | 1.68051400  | 3.48504400  | 1.35746200  |
| H  | -1.96728600 | 1.51103300  | -2.77624500 |
| H  | -3.16266600 | 2.44802300  | -1.88642700 |
| H  | 3.27393900  | 3.01412700  | -0.33633900 |
| H  | 2.72432600  | 3.01899500  | -2.02649500 |
| H  | 4.09343300  | -1.77378700 | 1.80269800  |
| H  | 3.62710600  | -3.13534700 | 0.75180300  |
| H  | -2.23259700 | -3.40068700 | 1.30339000  |
| H  | -1.29666200 | -3.43196100 | -0.17956900 |
| Li | -0.67174900 | 2.10187900  | 3.69405100  |
| Li | 0.42913700  | -2.52871800 | -1.77409200 |
| Li | 1.83058000  | 1.29825700  | 2.32900000  |
| Li | 0.05568000  | -0.02855500 | -3.02721700 |

### C4QLi<sub>5</sub> (by condensed Fukui function)

E= -1716.593386 hartrees

| Symbol | X           | Y           | Z           |
|--------|-------------|-------------|-------------|
| C      | -4.28412600 | 0.20534300  | -0.87474700 |
| C      | -2.98924000 | 0.30712100  | -1.30047600 |
| C      | -2.07064000 | -0.83308300 | -1.09772300 |
| C      | -2.50173600 | -1.89479200 | -0.16399400 |
| C      | -3.80394900 | -1.95650100 | 0.23001000  |
| C      | -4.79620100 | -0.95898100 | -0.16627200 |
| C      | 0.37632800  | -0.59844200 | 2.87358900  |

|   |             |             |             |
|---|-------------|-------------|-------------|
| C | -0.65949800 | -1.25728900 | 2.16852200  |
| C | -0.37246400 | -2.20948500 | 1.18007800  |
| C | 0.97359400  | -2.50061500 | 0.82422500  |
| C | 2.01523100  | -1.90591600 | 1.58348600  |
| C | 1.68714700  | -1.06485600 | 2.65485000  |
| C | 3.13694900  | 0.56598400  | 0.12556900  |
| C | 2.83391400  | 1.39642400  | -1.03202700 |
| C | 2.67066600  | 0.81432500  | -2.26980600 |
| C | 2.55439300  | -0.60654100 | -2.37188700 |
| C | 3.17217400  | -1.39545100 | -1.35419900 |
| C | 3.38072300  | -0.86293400 | -0.09769900 |
| C | -0.10323200 | 2.31305300  | -1.33960800 |
| C | -1.46878300 | 2.21765200  | -0.87581000 |
| C | -1.80869200 | 2.60597900  | 0.41361600  |
| C | -0.83181600 | 3.05575000  | 1.34754500  |
| C | 0.51462100  | 3.18085200  | 0.86243200  |
| C | 0.89595600  | 2.82215700  | -0.42674200 |
| C | -2.48475600 | 1.62155400  | -1.84334400 |
| C | 2.36812700  | 2.83190300  | -0.83916300 |
| C | 3.45302400  | -1.83707400 | 1.07131000  |
| C | -1.49180800 | -2.87360200 | 0.38294200  |
| O | -0.95403800 | -0.92857300 | -1.71317700 |
| O | 0.19767900  | 1.91191700  | -2.53455300 |
| O | 1.22611100  | -3.25015200 | -0.27456600 |
| O | 3.13965500  | 1.07428400  | 1.30500700  |
| O | 1.68840300  | -1.14473800 | -3.19399900 |
| O | 0.20578500  | 0.52651900  | 3.58617200  |
| O | -6.00392700 | -1.07747800 | 0.13683100  |
| O | -1.12824500 | 3.29903000  | 2.59914200  |
| H | -4.98082500 | 1.02303100  | -1.04521500 |
| H | -4.14317400 | -2.75455900 | 0.88698500  |
| H | -1.69080100 | -0.95733000 | 2.34828700  |
| H | 2.49755600  | -0.61852700 | 3.22989300  |
| H | 2.36603800  | 1.41864300  | -3.11534800 |
| H | 3.23702700  | -2.46768500 | -1.50671100 |
| H | -2.83794400 | 2.51738500  | 0.75944600  |
| H | 1.26141800  | 3.57676600  | 1.55398800  |
| H | -2.01386400 | 1.50977200  | -2.82413500 |
| H | -3.34203700 | 2.29226900  | -1.97045800 |
| H | 2.95308600  | 3.34483000  | -0.06989500 |
| H | 2.49400000  | 3.37431600  | -1.78419800 |
| H | 4.11280600  | -1.48264600 | 1.86898900  |
| H | 3.82854700  | -2.80336100 | 0.71758600  |
| H | -2.02901800 | -3.58711800 | 1.02056600  |

|    |             |             |             |
|----|-------------|-------------|-------------|
| H  | -1.04602400 | -3.46438300 | -0.42374800 |
| Li | -0.97252300 | 1.88272300  | 3.71902400  |
| Li | 0.65140200  | -2.20667900 | -1.76903800 |
| Li | 1.63287600  | 1.28512700  | 2.42890100  |
| Li | 0.11334900  | 0.12542700  | -3.01834000 |
| Li | 1.96370000  | -4.85428900 | -0.33419900 |

### C4QLi<sub>6</sub> (by condensed Fukui function)

E= -1724.210611 hartrees

| Symbol | X           | Y           | Z           |
|--------|-------------|-------------|-------------|
| C      | -4.11733700 | 0.56889400  | -0.98983200 |
| C      | -2.76708000 | 0.57521200  | -1.37242500 |
| C      | -1.96266300 | -0.59171000 | -1.23525400 |
| C      | -2.52592700 | -1.66553700 | -0.48928000 |
| C      | -3.87902800 | -1.64312800 | -0.11222200 |
| C      | -4.73778100 | -0.55428300 | -0.39254000 |
| C      | 0.24099800  | -0.97122400 | 2.83554900  |
| C      | -0.79652000 | -1.49591200 | 2.02564300  |
| C      | -0.52423700 | -2.33610000 | 0.93972700  |
| C      | 0.82523900  | -2.65762700 | 0.60800200  |
| C      | 1.86380000  | -2.19769600 | 1.45890800  |
| C      | 1.53904400  | -1.46436000 | 2.60768100  |
| C      | 3.15288000  | 0.37493100  | 0.27999700  |
| C      | 3.03468000  | 1.34455600  | -0.80507500 |
| C      | 2.89282100  | 0.90510500  | -2.10713100 |
| C      | 2.65935000  | -0.48561900 | -2.35974800 |
| C      | 3.15927200  | -1.43002300 | -1.38767100 |
| C      | 3.31437700  | -1.05510300 | -0.07918900 |
| C      | 0.28414100  | 2.50075900  | -1.14498700 |
| C      | -1.10862300 | 2.36003300  | -0.74853300 |
| C      | -1.47469100 | 2.58477200  | 0.55722300  |
| C      | -0.51894200 | 2.89277400  | 1.59185700  |
| C      | 0.85018100  | 3.01226300  | 1.19676500  |
| C      | 1.26240600  | 2.82349400  | -0.12105300 |
| C      | -2.12823400 | 1.89152400  | -1.78365100 |
| C      | 2.73973700  | 2.79616500  | -0.48055900 |
| C      | 3.31409200  | -2.13941800 | 0.98723700  |
| C      | -1.64738300 | -2.79940000 | 0.00974200  |
| O      | -0.70907600 | -0.64759000 | -1.73362800 |
| O      | 0.62713700  | 2.31122300  | -2.37303500 |
| O      | 1.09864600  | -3.28609600 | -0.55479900 |
| O      | 3.11736900  | 0.74941900  | 1.49628800  |

|    |             |             |             |
|----|-------------|-------------|-------------|
| O  | 1.85910500  | -0.88234600 | -3.29028900 |
| O  | 0.09111800  | 0.07975800  | 3.65806400  |
| O  | -6.01979600 | -0.56182500 | -0.06516400 |
| O  | -0.89719100 | 3.01176800  | 2.82849100  |
| H  | -4.70940000 | 1.47502200  | -1.12085100 |
| H  | -4.28557700 | -2.48769500 | 0.44497000  |
| H  | -1.81561400 | -1.15212800 | 2.19646200  |
| H  | 2.34726600  | -1.12128700 | 3.25311100  |
| H  | 2.73923100  | 1.61091400  | -2.91327700 |
| H  | 3.19255300  | -2.47697500 | -1.67048600 |
| H  | -2.51344900 | 2.47280700  | 0.86356100  |
| H  | 1.57869400  | 3.29589600  | 1.95734700  |
| H  | -1.63689100 | 1.82873300  | -2.76026800 |
| H  | -2.91633000 | 2.64858700  | -1.88469700 |
| H  | 3.33465600  | 3.16104400  | 0.36173400  |
| H  | 2.95183600  | 3.41858800  | -1.35694500 |
| H  | 3.96892400  | -1.89058600 | 1.82803400  |
| H  | 3.65969400  | -3.07994200 | 0.54514200  |
| H  | -2.28325200 | -3.51936300 | 0.54309500  |
| H  | -1.19809100 | -3.35532500 | -0.82056500 |
| Li | -1.00547200 | 1.49669700  | 3.83064600  |
| Li | 0.55935600  | -1.99432500 | -1.87126700 |
| Li | 1.60581400  | 0.87476100  | 2.65477700  |
| Li | 0.33120600  | 0.45938100  | -2.82639000 |
| Li | 1.69037600  | -4.91766000 | -0.84143400 |
| Li | -7.65467100 | -0.54646100 | 0.34404500  |

### C4QLi<sub>7</sub> (by condensed Fukui function)

E= -1731.820349 hartrees

| Symbol | X           | Y           | Z           |
|--------|-------------|-------------|-------------|
| C      | -4.09251100 | 0.04082400  | -1.12069900 |
| C      | -2.74026200 | 0.05727100  | -1.50682100 |
| C      | -1.87322400 | -1.02017500 | -1.15654300 |
| C      | -2.38772000 | -1.96467800 | -0.22163900 |
| C      | -3.74193600 | -1.94866500 | 0.15273300  |
| C      | -4.65671200 | -0.98140100 | -0.32315500 |
| C      | 0.22764300  | -0.40509100 | 2.88189700  |
| C      | -0.74494900 | -1.16085100 | 2.18732800  |
| C      | -0.38366200 | -2.20489600 | 1.32389600  |
| C      | 0.99112000  | -2.50625600 | 1.10463800  |
| C      | 1.96869900  | -1.81154700 | 1.86482100  |
| C      | 1.55733000  | -0.85935900 | 2.80826200  |

|    |             |             |             |
|----|-------------|-------------|-------------|
| C  | 3.21241000  | 0.53329300  | 0.25179800  |
| C  | 3.01625400  | 1.25140400  | -1.00068200 |
| C  | 2.94484500  | 0.55468900  | -2.18796500 |
| C  | 2.83337900  | -0.87354800 | -2.17092400 |
| C  | 3.34906200  | -1.55982000 | -1.02554200 |
| C  | 3.45658800  | -0.91007000 | 0.18785500  |
| C  | 0.14378400  | 2.18247000  | -1.65157200 |
| C  | -1.22871500 | 2.06772700  | -1.25340600 |
| C  | -1.65405000 | 2.55158400  | -0.01236100 |
| C  | -0.76505500 | 3.13788000  | 0.91141000  |
| C  | 0.59411600  | 3.20700500  | 0.54674000  |
| C  | 1.06164300  | 2.73630200  | -0.69761600 |
| C  | -2.19679500 | 1.31617000  | -2.16706500 |
| C  | 2.56325000  | 2.70337700  | -0.98281800 |
| C  | 3.43805300  | -1.76873800 | 1.44708400  |
| C  | -1.44606400 | -2.92126200 | 0.48721600  |
| O  | -0.61499800 | -1.11723600 | -1.63294400 |
| O  | 0.53697300  | 1.74423100  | -2.82968200 |
| O  | 1.33908100  | -3.34736700 | 0.10435700  |
| O  | 3.12215400  | 1.15277500  | 1.37634900  |
| O  | 2.06676100  | -1.48954900 | -3.02324600 |
| O  | -0.01188200 | 0.79772000  | 3.43660500  |
| O  | -5.94224200 | -1.00024800 | 0.00126700  |
| O  | -1.20178300 | 3.56949900  | 2.13266000  |
| H  | -4.73499000 | 0.86958500  | -1.42080700 |
| H  | -4.10348500 | -2.69570700 | 0.86057700  |
| H  | -1.78688300 | -0.84905900 | 2.24419800  |
| H  | 2.31893600  | -0.32193600 | 3.37085700  |
| H  | 2.70350500  | 1.07879300  | -3.10473600 |
| H  | 3.41023100  | -2.64240300 | -1.06653900 |
| H  | -2.69966600 | 2.44789200  | 0.27782900  |
| H  | 1.29827800  | 3.67514000  | 1.23922100  |
| H  | -1.67556900 | 1.09765900  | -3.10535200 |
| H  | -3.04652100 | 1.96281200  | -2.42585800 |
| H  | 3.09449300  | 3.27655100  | -0.21598300 |
| H  | 2.77931400  | 3.15246800  | -1.96033900 |
| H  | 4.03759000  | -1.33239000 | 2.25254200  |
| H  | 3.84211900  | -2.76017300 | 1.21426500  |
| H  | -2.04184300 | -3.57654300 | 1.13838600  |
| H  | -0.93543500 | -3.58458300 | -0.21944600 |
| Li | -1.21221100 | 2.11143500  | 3.24111400  |
| Li | 0.79375000  | -2.32472000 | -1.45440800 |
| Li | 1.44791800  | 1.44509200  | 2.22491200  |
| Li | 0.42248500  | -0.11747900 | -2.82756400 |

|    |             |             |            |
|----|-------------|-------------|------------|
| Li | 2.01887500  | -4.96070500 | 0.11653200 |
| Li | -7.58604400 | -1.02306400 | 0.35920400 |
| Li | -1.71534700 | 5.22326500  | 2.45255100 |

### C4QLi<sub>8</sub> (by condensed Fukui function)

E= -1739.420038 hartrees

| Symbol | X           | Y           | Z           |
|--------|-------------|-------------|-------------|
| C      | -4.18725500 | 0.12994200  | -0.98771400 |
| C      | -2.84764900 | 0.08627200  | -1.41662700 |
| C      | -2.00188000 | -1.00576000 | -1.05011500 |
| C      | -2.52140000 | -1.89318300 | -0.06044800 |
| C      | -3.86210700 | -1.81645400 | 0.35393000  |
| C      | -4.75979000 | -0.83899500 | -0.13273900 |
| C      | 0.27481200  | -0.29647900 | 2.85036200  |
| C      | -0.75433500 | -1.04076500 | 2.23278200  |
| C      | -0.47006200 | -2.14918500 | 1.41847000  |
| C      | 0.87770700  | -2.53070200 | 1.16742400  |
| C      | 1.91512300  | -1.83461400 | 1.84661600  |
| C      | 1.57921700  | -0.81682000 | 2.75112100  |
| C      | 3.25408600  | 0.39218000  | 0.08780500  |
| C      | 2.98362400  | 1.03721600  | -1.15103100 |
| C      | 2.77859500  | 0.27715600  | -2.31140400 |
| C      | 2.61556600  | -1.12516300 | -2.24423100 |
| C      | 3.14263900  | -1.74904900 | -1.09412500 |
| C      | 3.38617300  | -1.02690800 | 0.08934300  |
| C      | 0.09021600  | 2.09298100  | -1.77984300 |
| C      | -1.26496700 | 2.05786800  | -1.31528100 |
| C      | -1.61731800 | 2.61617800  | -0.08037700 |
| C      | -0.66590200 | 3.20504600  | 0.77398400  |
| C      | 0.67950400  | 3.18509400  | 0.35236400  |
| C      | 1.07643300  | 2.63230800  | -0.88349500 |
| C      | -2.29339600 | 1.29813400  | -2.15216700 |
| C      | 2.56674200  | 2.50630800  | -1.21128200 |
| C      | 3.36892200  | -1.85726800 | 1.37535200  |
| C      | -1.59072500 | -2.85559600 | 0.65329700  |
| O      | -0.76851800 | -1.16933500 | -1.55943500 |
| O      | 0.39954600  | 1.59734900  | -2.95949900 |
| O      | 1.14016400  | -3.44812000 | 0.20979500  |
| O      | 3.28255500  | 1.12106100  | 1.24212000  |
| O      | 2.27373750  | -1.83551315 | -3.32356168 |
| O      | 0.11634500  | 0.94559400  | 3.34617600  |
| O      | -6.03644800 | -0.80182200 | 0.22986000  |

|    |             |             |             |
|----|-------------|-------------|-------------|
| O  | -1.02738300 | 3.72244300  | 1.98960900  |
| H  | -4.81248600 | 0.96627400  | -1.30394400 |
| H  | -4.22550200 | -2.52343300 | 1.10132200  |
| H  | -1.77816800 | -0.67527300 | 2.30119500  |
| H  | 2.38436100  | -0.27930800 | 3.24865200  |
| H  | 2.46917200  | 0.79316300  | -3.21303400 |
| H  | 3.12379600  | -2.83358100 | -1.04287400 |
| H  | -2.65329500 | 2.57095900  | 0.25707600  |
| H  | 1.43325700  | 3.64438300  | 0.99732000  |
| H  | -1.80979800 | 1.01982800  | -3.09449900 |
| H  | -3.13443800 | 1.95740200  | -2.40962900 |
| H  | 3.14291400  | 3.11450600  | -0.50486400 |
| H  | 2.76264900  | 2.88723500  | -2.22241100 |
| H  | 4.01140400  | -1.43381700 | 2.15567600  |
| H  | 3.72431700  | -2.87155000 | 1.15839100  |
| H  | -2.18619100 | -3.46365100 | 1.34996300  |
| H  | -1.12711500 | -3.56013200 | -0.04526000 |
| Li | -1.00951300 | 2.31224900  | 3.15239500  |
| Li | 0.67596300  | -2.39055800 | -1.42202800 |
| Li | 1.54235700  | 1.39697700  | 1.94483900  |
| Li | 0.33966200  | -0.28983700 | -2.81658900 |
| Li | 1.80370100  | -5.05476600 | 0.18680700  |
| Li | -7.67228300 | -0.77506000 | 0.61556400  |
| Li | -1.47792600 | 5.40224900  | 2.24066800  |
| Li | 1.58398459  | -2.66555321 | -4.52519361 |

### C4QLi<sub>1</sub> (by lowest energy method)

E= -1686.127449 hartrees

| Symbol | X           | Y           | Z           |
|--------|-------------|-------------|-------------|
| C      | -4.21389000 | 1.27002400  | -1.13089400 |
| C      | -2.86589200 | 1.29431300  | -1.14450100 |
| C      | -2.11475500 | -0.00027800 | -1.24683300 |
| C      | -2.86593800 | -1.29476200 | -1.14399700 |
| C      | -4.21394700 | -1.27035300 | -1.13043400 |
| C      | -4.97734400 | -0.00015900 | -1.16141300 |
| C      | -0.41029400 | -1.97125100 | 2.39031100  |
| C      | -1.39685300 | -2.17973300 | 1.34684000  |
| C      | -1.03757300 | -2.50383400 | 0.07465300  |
| C      | 0.38804000  | -2.76850000 | -0.24609600 |
| C      | 1.39492800  | -2.50093800 | 0.81000100  |
| C      | 0.99049700  | -2.15798900 | 2.06393300  |
| C      | 3.23361500  | -0.00002500 | 0.38774000  |



|    |             |             |             |
|----|-------------|-------------|-------------|
| C  | 3.19091800  | 1.28622200  | -0.37610900 |
| C  | 3.41160200  | 1.26756500  | -1.70558100 |
| C  | 3.62600700  | -0.00059400 | -2.44252900 |
| C  | 3.41161800  | -1.26843700 | -1.70507300 |
| C  | 3.19089600  | -1.28658000 | -0.37559600 |
| C  | 0.38820300  | 2.76843200  | -0.24714200 |
| C  | -1.03745700 | 2.50382000  | 0.07369900  |
| C  | -1.39667500 | 2.18036900  | 1.34604300  |
| C  | -0.41009000 | 1.97251000  | 2.38969400  |
| C  | 0.99068500  | 2.15891300  | 2.06323300  |
| C  | 1.39510700  | 2.50124600  | 0.80914200  |
| C  | -2.03456100 | 2.55360800  | -1.06873200 |
| C  | 2.85531600  | 2.54194000  | 0.40619600  |
| C  | 2.85518100  | -2.54193700 | 0.40718300  |
| C  | -2.03482500 | -2.55417300 | -1.06762900 |
| O  | -0.89871600 | -0.00032600 | -1.40187400 |
| O  | 0.72508600  | 3.20178900  | -1.35756300 |
| O  | 0.72488100  | -3.20223900 | -1.35645600 |
| O  | 3.30071600  | 0.00020400  | 1.61633600  |
| O  | 3.92865600  | -0.00081900 | -3.63382500 |
| O  | -0.76296000 | -1.56450300 | 3.54186400  |
| O  | -6.20638100 | -0.00013500 | -1.16991700 |
| O  | -0.76281200 | 1.56627700  | 3.54142600  |
| H  | -4.81065300 | 2.17805100  | -1.08239000 |
| H  | -4.81075700 | -2.17833200 | -1.08159400 |
| H  | -2.43435800 | -1.99092000 | 1.61492100  |
| H  | 1.71225200  | -1.94771800 | 2.84812400  |
| H  | 3.41291700  | 2.17467200  | -2.30370700 |
| H  | 3.41293900  | -2.17578900 | -2.30282700 |
| H  | -2.43414100 | 1.99162200  | 1.61433500  |
| H  | 1.71250700  | 1.94894500  | 2.84744400  |
| H  | -1.46773800 | 2.69088000  | -1.99639000 |
| H  | -2.70231200 | 3.41764800  | -0.96428400 |
| H  | 3.47923100  | 2.60017000  | 1.30327000  |
| H  | 3.04648200  | 3.41627200  | -0.22214700 |
| H  | 3.47898500  | -2.59985800 | 1.30435000  |
| H  | 3.04633300  | -3.41656300 | -0.22076800 |
| H  | -2.70276900 | -3.41797200 | -0.96245900 |
| H  | -1.46819200 | -2.69216800 | -1.99529500 |
| Li | -0.91119900 | 0.00085400  | 4.36760600  |

**C4QLi<sub>2</sub> (by lowest energy method)**

E= -1693.711664 hartrees

| Symbol | X           | Y           | Z           |
|--------|-------------|-------------|-------------|
| C      | -4.06721600 | 1.41846800  | -0.58636200 |
| C      | -2.75370900 | 1.39466600  | -0.90338800 |
| C      | -2.15265000 | 0.10158700  | -1.35355200 |
| C      | -2.88188800 | -1.16570100 | -1.05067500 |
| C      | -4.19187300 | -1.09477600 | -0.72090600 |
| C      | -4.89467000 | 0.19289300  | -0.55675300 |
| C      | -0.19465600 | -2.19200800 | 2.28940600  |
| C      | -1.24720000 | -2.28942800 | 1.31383800  |
| C      | -0.98202200 | -2.41866800 | -0.02899900 |
| C      | 0.39398400  | -2.47305800 | -0.50683900 |
| C      | 1.45851500  | -2.52172900 | 0.48629800  |
| C      | 1.15025300  | -2.36550700 | 1.82309500  |
| C      | 3.34523100  | -0.05278500 | 0.21137200  |
| C      | 3.16521300  | 1.28461200  | -0.44104500 |
| C      | 2.90643300  | 1.36535500  | -1.77256900 |
| C      | 2.65819600  | 0.14890900  | -2.54381200 |
| C      | 3.04760400  | -1.13239700 | -1.97507400 |
| C      | 3.19404100  | -1.26735700 | -0.63223200 |
| C      | 0.55905300  | 2.81574900  | 0.02499700  |
| C      | -0.83987400 | 2.41788000  | 0.32442900  |
| C      | -1.14070200 | 1.90209900  | 1.54716900  |
| C      | -0.11348100 | 1.63634700  | 2.54681700  |
| C      | 1.27066200  | 1.89753200  | 2.19827300  |
| C      | 1.61617500  | 2.42272900  | 0.98905900  |
| C      | -1.85329800 | 2.59683800  | -0.79655900 |
| C      | 3.04467300  | 2.47992400  | 0.48510200  |
| C      | 2.91659700  | -2.58876700 | 0.04085000  |
| C      | -2.09890200 | -2.45281300 | -1.06593800 |
| O      | -1.08393800 | 0.09465700  | -1.98508300 |
| O      | 0.82959400  | 3.43914900  | -1.01032500 |
| O      | 0.63471200  | -2.44550400 | -1.76756200 |
| O      | 3.60649700  | -0.13838600 | 1.41497400  |
| O      | 1.92745600  | 0.16412200  | -3.57040600 |
| O      | -0.45654100 | -1.94266900 | 3.52632700  |
| O      | -6.10551900 | 0.24394200  | -0.33950200 |
| O      | -0.42568600 | 1.13357300  | 3.66682600  |
| H      | -4.57353700 | 2.34116400  | -0.31251100 |
| H      | -4.78478400 | -1.98821000 | -0.53995200 |
| H      | -2.26999100 | -2.21887000 | 1.67946300  |
| H      | 1.94269000  | -2.33431400 | 2.56599000  |
| H      | 2.67815400  | 2.31293400  | -2.25060500 |
| H      | 2.92742600  | -2.00175800 | -2.61171900 |

|   |             |            |             |
|---|-------------|------------|-------------|
| H | -2.15615400 | 1.62028700 | 1.81573700  |
| H | 2.02739800  | 1.59521800 | 2.91628800  |
| H | -1.29749800 | 2.75994500 | -1.72462100 |
| H | -2.46135100 | 3.49403000 | -0.62599700 |
| H | 3.74663800  | 2.39973200 | 1.31825600  |

### C4QLi<sub>3</sub> (by lowest energy method)

E= -1701.35297 hartrees

| Symbol | X           | Y           | Z           |
|--------|-------------|-------------|-------------|
| C      | -4.09705200 | 1.22520300  | -0.64297500 |
| C      | -2.77212400 | 1.23678700  | -1.01504300 |
| C      | -2.10391100 | -0.00134600 | -1.34409600 |
| C      | -2.77246800 | -1.23875500 | -1.01283000 |
| C      | -4.09737900 | -1.22619300 | -0.64085100 |
| C      | -4.85733100 | -0.00025500 | -0.49648600 |
| C      | -0.20613600 | -2.07378100 | 2.43857200  |
| C      | -1.22444200 | -2.25065900 | 1.43432400  |
| C      | -0.91358800 | -2.50327800 | 0.12362000  |
| C      | 0.48053600  | -2.65419000 | -0.27280000 |
| C      | 1.51669700  | -2.55407900 | 0.74878000  |
| C      | 1.16499400  | -2.28722400 | 2.05011900  |
| C      | 3.35225500  | -0.00008200 | 0.29823400  |
| C      | 3.20811000  | 1.29170700  | -0.45819000 |
| C      | 3.04051200  | 1.25635000  | -1.80248700 |
| C      | 2.62480200  | -0.00343000 | -2.40170100 |
| C      | 3.04042200  | -1.26172600 | -1.79934200 |
| C      | 3.20780500  | -1.29370300 | -0.45494900 |
| C      | 0.48119000  | 2.65370600  | -0.27849900 |
| C      | -0.91286000 | 2.50346100  | 0.11870600  |
| C      | -1.22331000 | 2.25387000  | 1.43006000  |
| C      | -0.20470700 | 2.07986100  | 2.43455500  |
| C      | 1.16631400  | 2.29204500  | 2.04504700  |
| C      | 1.51766400  | 2.55561500  | 0.74292000  |
| C      | -1.98988700 | 2.53748800  | -0.96063700 |
| C      | 2.98577300  | 2.56918100  | 0.31841300  |
| C      | 2.98490700  | -2.56915800 | 0.32476900  |
| C      | -1.99042400 | -2.53947600 | -0.95584700 |
| O      | -0.90184400 | -0.00206700 | -1.90248200 |
| O      | 0.78398500  | 2.80537100  | -1.51634800 |
| O      | 0.78380300  | -2.80831700 | -1.51029500 |
| O      | 3.61408600  | 0.00138600  | 1.49653900  |
| O      | 1.69759700  | -0.00457900 | -3.26366200 |

|    |             |             |             |
|----|-------------|-------------|-------------|
| O  | -0.50118100 | -1.66556100 | 3.61879400  |
| O  | -6.07916100 | 0.00016600  | -0.19463100 |
| O  | -0.49942200 | 1.67547400  | 3.61621100  |
| H  | -4.61803900 | 2.15214800  | -0.41409800 |
| H  | -4.61861600 | -2.15258400 | -0.41030200 |
| H  | -2.25589300 | -2.09430800 | 1.74181100  |
| H  | 1.92496000  | -2.14788300 | 2.81441600  |
| H  | 2.89231800  | 2.16377400  | -2.37528700 |
| H  | 2.89241800  | -2.17064100 | -2.36983100 |
| H  | -2.25468200 | 2.09830200  | 1.73822200  |
| H  | 1.92651200  | 2.15453600  | 2.80944500  |
| H  | -1.52888800 | 2.79109800  | -1.92113600 |
| H  | -2.69165000 | 3.35172600  | -0.74568900 |
| H  | 3.62314400  | 2.61117200  | 1.20520600  |
| H  | 3.20069200  | 3.43115300  | -0.32127200 |
| H  | 3.62206400  | -2.60914100 | 1.21180900  |
| H  | 3.19966000  | -3.43276000 | -0.31276100 |
| H  | -2.69233600 | -3.35316400 | -0.73932400 |
| H  | -1.52935900 | -2.79509100 | -1.91578600 |
| Li | -0.69203900 | 0.00544500  | 4.22260100  |
| Li | 0.22694800  | -1.35158800 | -2.53911000 |
| Li | 0.22729800  | 1.34582100  | -2.54240800 |

### C4QLi<sub>4</sub> (by lowest energy method)

E= -1708.926161 hartrees

| Symbol | X           | Y           | Z           |
|--------|-------------|-------------|-------------|
| C      | -4.26284800 | 0.37936000  | -0.86053200 |
| C      | -2.96230400 | 0.41035300  | -1.26082300 |
| C      | -2.12293700 | -0.79172000 | -1.04752300 |
| C      | -2.60695900 | -1.81105300 | -0.08825300 |
| C      | -3.91178500 | -1.80536100 | 0.28434700  |
| C      | -4.84970000 | -0.75669100 | -0.14313100 |
| C      | 0.39996600  | -0.57262100 | 2.87263300  |
| C      | -0.69577600 | -1.19963500 | 2.19959300  |
| C      | -0.48088700 | -2.16999100 | 1.23970600  |
| C      | 0.86527100  | -2.53607200 | 0.84665900  |
| C      | 1.95376600  | -1.99656300 | 1.62030600  |
| C      | 1.68392400  | -1.11354000 | 2.66497800  |
| C      | 3.13263000  | 0.29544900  | 0.07311400  |
| C      | 2.89246600  | 1.11514200  | -1.12027100 |
| C      | 2.67267800  | 0.49973900  | -2.32516400 |
| C      | 2.44147600  | -0.92059400 | -2.36079200 |

|    |             |             |             |
|----|-------------|-------------|-------------|
| C  | 3.03846300  | -1.72045400 | -1.33406900 |
| C  | 3.30699500  | -1.15839500 | -0.10454300 |
| C  | 0.07390900  | 2.20958700  | -1.37975800 |
| C  | -1.28783400 | 2.21585000  | -0.88337300 |
| C  | -1.57120400 | 2.66178500  | 0.39052900  |
| C  | -0.53953700 | 3.07145900  | 1.29682800  |
| C  | 0.80007800  | 3.09174300  | 0.78430100  |
| C  | 1.12408400  | 2.68061900  | -0.50563400 |
| C  | -2.36472000 | 1.67903400  | -1.81839800 |
| C  | 2.57377700  | 2.58955700  | -0.96663600 |
| C  | 3.37879400  | -2.07713900 | 1.10100900  |
| C  | -1.63387000 | -2.81287600 | 0.48183000  |
| O  | -1.02820300 | -0.97438600 | -1.67090800 |
| O  | 0.31804400  | 1.76511400  | -2.56742400 |
| O  | 1.05905100  | -3.26065200 | -0.21212300 |
| O  | 3.16430200  | 0.83706100  | 1.22190400  |
| O  | 1.53824900  | -1.41266400 | -3.15540100 |
| O  | 0.28023800  | 0.57797400  | 3.52688600  |
| O  | -6.05073700 | -0.80005400 | 0.14908200  |
| O  | -0.80173600 | 3.36431100  | 2.53606600  |
| H  | -4.92363600 | 1.22340400  | -1.04119400 |
| H  | -4.31160000 | -2.56690700 | 0.94957400  |
| H  | -1.70316600 | -0.84705200 | 2.41421600  |
| H  | 2.51127500  | -0.70526300 | 3.24120900  |
| H  | 2.44122400  | 1.08196800  | -3.20832100 |
| H  | 3.05653500  | -2.79661700 | -1.45980200 |
| H  | -2.59424200 | 2.67320000  | 0.76255200  |
| H  | 1.57759500  | 3.50019900  | 1.43360900  |
| H  | -1.92339900 | 1.53011800  | -2.80815700 |
| H  | -3.16860700 | 2.41399200  | -1.93741600 |
| H  | 3.22733100  | 3.07093600  | -0.23357300 |
| H  | 2.70294200  | 3.09181200  | -1.93179500 |
| H  | 4.08418600  | -1.72558400 | 1.85922900  |
| H  | 3.66070700  | -3.08597300 | 0.78640900  |
| H  | -2.18900500 | -3.48154600 | 1.15160400  |
| H  | -1.21182100 | -3.45282600 | -0.30013500 |
| Li | -0.77105200 | 2.01695700  | 3.68916000  |
| Li | 0.50917600  | -2.40901900 | -1.76307200 |
| Li | 0.12871000  | -0.01303800 | -2.97403400 |
| Li | 1.68066700  | 1.25865800  | 2.29986300  |

**C4QLi<sub>5</sub> (by lowest energy method)**

E= -1716.558307 hartrees

| Symbol | X           | Y           | Z           |
|--------|-------------|-------------|-------------|
| C      | -4.07660400 | 0.69693100  | -0.89132200 |
| C      | -2.74732800 | 0.70880800  | -1.31404800 |
| C      | -1.96526400 | -0.48892800 | -1.29978800 |
| C      | -2.54380800 | -1.61871600 | -0.64152000 |
| C      | -3.87534500 | -1.59371800 | -0.21819200 |
| C      | -4.69986200 | -0.46278800 | -0.38121600 |
| C      | 0.22902300  | -1.30031900 | 2.70581700  |
| C      | -0.83600100 | -1.72710600 | 1.86466300  |
| C      | -0.58480000 | -2.44392800 | 0.70937900  |
| C      | 0.79011600  | -2.73136100 | 0.31780000  |
| C      | 1.85765300  | -2.40726400 | 1.24916600  |
| C      | 1.53398100  | -1.80929400 | 2.44862800  |
| C      | 3.23973700  | 0.20665500  | 0.29059600  |
| C      | 3.10937500  | 1.26343500  | -0.70170200 |
| C      | 2.95506700  | 0.94074500  | -2.03136700 |
| C      | 2.69614700  | -0.41786000 | -2.40039400 |
| C      | 3.17783700  | -1.44280100 | -1.52181400 |
| C      | 3.36544600  | -1.17215500 | -0.18673200 |
| C      | 0.31555600  | 2.54331700  | -0.93619300 |
| C      | -1.08208400 | 2.41302000  | -0.54904200 |
| C      | -1.44018400 | 2.52267700  | 0.77116200  |
| C      | -0.46812700 | 2.70644900  | 1.81259800  |
| C      | 0.90827000  | 2.84899000  | 1.42182800  |
| C      | 1.31842200  | 2.74468100  | 0.10753000  |
| C      | -2.10020500 | 2.04693800  | -1.62261000 |
| C      | 2.79775600  | 2.68488300  | -0.25520100 |
| C      | 3.30520300  | -2.34953300 | 0.78161600  |
| C      | -1.69105100 | -2.81378900 | -0.26886600 |
| O      | -0.73568600 | -0.53176500 | -1.83057500 |
| O      | 0.64946300  | 2.42998700  | -2.16518800 |
| O      | 1.04208500  | -3.15981100 | -0.86400100 |
| O      | 3.18208600  | 0.48161700  | 1.54630600  |
| O      | 1.82877200  | -0.69982200 | -3.32682000 |
| O      | 0.11985600  | -0.30855100 | 3.57735500  |
| O      | -5.97816600 | -0.47005500 | -0.03159800 |
| O      | -0.80281900 | 2.65073900  | 3.06216700  |
| H      | -4.66079300 | 1.61511500  | -0.93125500 |
| H      | -4.30203800 | -2.47419200 | 0.25994900  |
| H      | -1.84562000 | -1.38276300 | 2.08040500  |
| H      | 2.32879500  | -1.53438900 | 3.14018700  |
| H      | 2.76476800  | 1.71658600  | -2.76282600 |
| H      | 3.13451100  | -2.46991900 | -1.86724700 |

|    |             |             |             |
|----|-------------|-------------|-------------|
| H  | -2.47612000 | 2.38949300  | 1.07534800  |
| H  | 1.63759900  | 3.03936800  | 2.21068500  |
| H  | -1.60730300 | 2.06372200  | -2.59913900 |
| H  | -2.88119300 | 2.81625600  | -1.66047100 |
| H  | 3.39791100  | 2.97256700  | 0.61291100  |
| H  | 3.01554300  | 3.37647200  | -1.07630800 |
| H  | 3.96442100  | -2.20432700 | 1.64297900  |
| H  | 3.60279800  | -3.26310000 | 0.25801800  |
| H  | -2.33472800 | -3.57657800 | 0.18827400  |
| H  | -1.23344900 | -3.29126500 | -1.14107800 |
| Li | -0.95298900 | 1.08930200  | 3.89365500  |
| Li | 0.52248300  | -1.87456000 | -2.19636500 |
| Li | 0.37027400  | 0.63488400  | -2.79244600 |
| Li | 1.67246000  | 0.58281300  | 2.58018600  |
| Li | -7.57336100 | -0.50563800 | 0.26955000  |

### C4QLi<sub>6</sub> (by lowest energy method)

E= -1724.172598 hartrees

| Symbol | X           | Y           | Z           |
|--------|-------------|-------------|-------------|
| C      | -4.12282700 | 0.65920000  | -0.89035300 |
| C      | -2.78108900 | 0.70304000  | -1.28124800 |
| C      | -1.97693600 | -0.47056300 | -1.25917600 |
| C      | -2.53841200 | -1.61316800 | -0.62713500 |
| C      | -3.88257500 | -1.62787600 | -0.23437700 |
| C      | -4.72817300 | -0.51529000 | -0.40090400 |
| C      | 0.27423500  | -1.26723600 | 2.70581900  |
| C      | -0.77661800 | -1.69509500 | 1.85173000  |
| C      | -0.52937200 | -2.42214700 | 0.69143300  |
| C      | 0.81658500  | -2.69575000 | 0.31397700  |
| C      | 1.87289500  | -2.36910500 | 1.21022800  |
| C      | 1.56062300  | -1.75555600 | 2.43850800  |
| C      | 3.14857100  | 0.35978500  | 0.26406000  |
| C      | 3.01968400  | 1.41656200  | -0.72194500 |
| C      | 2.84423800  | 1.10160900  | -2.06065000 |
| C      | 2.59879000  | -0.25101000 | -2.44194400 |
| C      | 3.11536900  | -1.27538600 | -1.56907500 |
| C      | 3.30376700  | -1.01741500 | -0.23640200 |
| C      | 0.26943600  | 2.60354900  | -0.91245800 |
| C      | -1.12120800 | 2.41869600  | -0.51392500 |
| C      | -1.46926000 | 2.50362100  | 0.80707300  |
| C      | -0.49413900 | 2.70719000  | 1.85267100  |
| C      | 0.87262600  | 2.87719800  | 1.45711800  |

|    |             |             |             |
|----|-------------|-------------|-------------|
| C  | 1.26909500  | 2.82417300  | 0.12792900  |
| C  | -2.14736500 | 2.04943800  | -1.57806100 |
| C  | 2.73656100  | 2.83376800  | -0.25974000 |
| C  | 3.32458700  | -2.19409300 | 0.72345500  |
| C  | -1.65766000 | -2.79245200 | -0.26791400 |
| O  | -0.72429100 | -0.47860100 | -1.75954400 |
| O  | 0.59436900  | 2.53379200  | -2.14739600 |
| O  | 1.10156600  | -3.23509800 | -0.90383800 |
| O  | 3.11065000  | 0.60440100  | 1.52153700  |
| O  | 1.77049800  | -0.57197800 | -3.38485400 |
| O  | 0.13198700  | -0.28932900 | 3.61303400  |
| O  | -6.01492700 | -0.55114000 | -0.06159700 |
| O  | -0.84498100 | 2.67071500  | 3.09689700  |
| H  | -4.72405300 | 1.56657400  | -0.93439500 |
| H  | -4.29551000 | -2.52251900 | 0.23046100  |
| H  | -1.79131100 | -1.36175300 | 2.06105600  |
| H  | 2.37150900  | -1.47870700 | 3.10956300  |
| H  | 2.67559400  | 1.88365500  | -2.78931700 |
| H  | 3.12999000  | -2.29198100 | -1.94851300 |
| H  | -2.49970400 | 2.34402300  | 1.11740600  |
| H  | 1.60231700  | 3.09787300  | 2.23674900  |
| H  | -1.66655000 | 2.08293400  | -2.56103600 |
| H  | -2.93430700 | 2.81392200  | -1.59972700 |
| H  | 3.35054000  | 3.11576200  | 0.60054000  |
| H  | 2.92677000  | 3.53585000  | -1.07853100 |
| H  | 3.97059700  | -2.01554300 | 1.58763000  |
| H  | 3.75510900  | -3.05950100 | 0.18541900  |
| H  | -2.28377100 | -3.56462500 | 0.19989200  |
| H  | -1.21791900 | -3.26171400 | -1.15493600 |
| Li | -0.93423500 | 1.09106100  | 3.91614700  |
| Li | 0.54581300  | -1.79452200 | -2.09943600 |
| Li | 0.31053600  | 0.71482200  | -2.76082700 |
| Li | 1.58163400  | 0.61009700  | 2.59145800  |
| Li | -7.60156300 | -0.56624700 | 0.24503700  |
| Li | 2.03886700  | -4.36203300 | 0.04483600  |

### **C4QLi<sub>7</sub> (by lowest energy method)**

E= -1731.805782 hartrees

| Symbol | X           | Y           | Z           |
|--------|-------------|-------------|-------------|
| C      | -4.05541300 | 0.54967800  | -1.36154000 |
| C      | -2.66981900 | 0.68583700  | -1.52184000 |
| C      | -1.80913700 | -0.44260700 | -1.40154200 |



|   |             |             |             |
|---|-------------|-------------|-------------|
| C | -2.41054600 | -1.65282200 | -0.95597200 |
| C | -3.79975800 | -1.75104000 | -0.79641100 |
| C | -4.66711400 | -0.67163100 | -1.03214500 |
| C | -0.10848100 | -1.45237500 | 2.73690200  |
| C | -1.02481900 | -1.86637700 | 1.73913000  |
| C | -0.61062500 | -2.55517500 | 0.59781800  |
| C | 0.77206900  | -2.81226600 | 0.40988200  |
| C | 1.70427200  | -2.43150900 | 1.41285200  |
| C | 1.22544300  | -1.87830100 | 2.61145500  |
| C | 2.89948000  | 0.38923900  | 0.67856300  |
| C | 2.83785500  | 1.48436500  | -0.24108300 |
| C | 3.05710300  | 1.28514700  | -1.61257100 |
| C | 3.32452800  | 0.01216700  | -2.16362900 |
| C | 3.37163400  | -1.07159100 | -1.25947700 |
| C | 3.18255000  | -0.90438600 | 0.12264900  |
| C | 0.09037400  | 2.81415500  | -0.64865500 |
| C | -1.31813700 | 2.51627000  | -0.46425400 |
| C | -1.84312300 | 2.47895600  | 0.80488300  |
| C | -1.02278400 | 2.64253700  | 1.97388100  |
| C | 0.38445600  | 2.87795200  | 1.77687300  |
| C | 0.95058800  | 2.91074000  | 0.52105500  |
| C | -2.12227000 | 2.09488800  | -1.68682000 |
| C | 2.45006000  | 2.86361700  | 0.28731800  |
| C | 3.16637200  | -2.12393400 | 1.03818800  |
| C | -1.56917400 | -2.84965800 | -0.55202800 |
| O | -0.47214100 | -0.36379000 | -1.65508300 |
| O | 0.59096600  | 2.87639000  | -1.83136300 |
| O | 1.24247000  | -3.31790800 | -0.77277100 |
| O | 2.68927300  | 0.56614600  | 1.96072200  |
| O | 3.53383500  | -0.15436800 | -3.47375300 |
| O | -0.39885800 | -0.51254700 | 3.65254200  |
| O | -5.98987800 | -0.78656700 | -0.90707000 |
| O | -1.50772400 | 2.46086800  | 3.16111500  |
| H | -4.69132100 | 1.42707200  | -1.47354100 |
| H | -4.23206500 | -2.69460900 | -0.46515200 |
| H | -2.06079200 | -1.54080600 | 1.81160000  |
| H | 1.94309300  | -1.56976200 | 3.36847100  |
| H | 3.04108000  | 2.14224700  | -2.28240400 |
| H | 3.60718900  | -2.05767000 | -1.65813900 |
| H | -2.88706100 | 2.21709800  | 0.96315100  |
| H | 1.00847300  | 2.98337900  | 2.66456600  |
| H | -1.48750000 | 2.19855800  | -2.57289200 |
| H | -2.96450000 | 2.78248800  | -1.83366000 |
| H | 2.97188800  | 3.05864600  | 1.22974200  |

|    |             |             |             |
|----|-------------|-------------|-------------|
| H  | 2.73969300  | 3.62737200  | -0.44284700 |
| H  | 3.72507800  | -1.92151600 | 1.95766500  |
| H  | 3.71265800  | -2.94023100 | 0.52262600  |
| H  | -2.24569500 | -3.66492200 | -0.26172900 |
| H  | -0.98457500 | -3.23951500 | -1.39347400 |
| Li | -1.54761400 | 0.81613900  | 3.85733500  |
| Li | 0.85603400  | -1.63609800 | -1.51318900 |
| Li | 0.64680800  | 1.02439800  | -2.05259400 |
| Li | 1.14304000  | 0.47364700  | 2.84741900  |
| Li | -7.59540500 | -0.88611600 | -0.79835100 |
| Li | 2.22974100  | -4.30103000 | 0.27431700  |
| Li | 3.92982800  | -0.09256500 | -5.04480400 |

### C4QLi<sub>8</sub> (by lowest energy method)

E= -1731.805782 hartrees

| Symbol | X           | Y           | Z           |
|--------|-------------|-------------|-------------|
| C      | -4.01009400 | 0.08124000  | -1.49719900 |
| C      | -2.62771600 | 0.25395200  | -1.66405900 |
| C      | -1.72086800 | -0.80122500 | -1.34981200 |
| C      | -2.28085700 | -1.94633800 | -0.71414300 |
| C      | -3.66722300 | -2.07989200 | -0.55571700 |
| C      | -4.57517700 | -1.09614500 | -0.98010200 |
| C      | -0.05228000 | -1.00913100 | 2.89920700  |
| C      | -0.93185900 | -1.63171000 | 1.98134200  |
| C      | -0.46843500 | -2.48853500 | 0.98130400  |
| C      | 0.92693300  | -2.70872200 | 0.85272400  |
| C      | 1.82423100  | -2.12531600 | 1.78972900  |
| C      | 1.30016400  | -1.39132100 | 2.86729600  |
| C      | 2.93212800  | 0.57282100  | 0.63370600  |
| C      | 2.80978100  | 1.50280000  | -0.44787800 |
| C      | 3.06374800  | 1.10214900  | -1.76631900 |
| C      | 3.40788900  | -0.22651200 | -2.10705600 |
| C      | 3.49388500  | -1.15112400 | -1.04658600 |
| C      | 3.27793900  | -0.77445100 | 0.29303100  |
| C      | -0.00056500 | 2.62519900  | -1.11972100 |
| C      | -1.37407200 | 2.29820500  | -0.91411100 |
| C      | -1.93678500 | 2.40317000  | 0.36744100  |
| C      | -1.17061700 | 2.78624500  | 1.49157200  |
| C      | 0.20518400  | 3.03522200  | 1.30302400  |
| C      | 0.80173100  | 2.90432500  | 0.04178900  |
| C      | -2.13768800 | 1.63856100  | -2.05501600 |
| C      | 2.31240700  | 2.91449600  | -0.14443800 |

|    |             |             |             |
|----|-------------|-------------|-------------|
| C  | 3.28477700  | -1.82894000 | 1.39358600  |
| C  | -1.39362200 | -3.01823800 | -0.10922700 |
| O  | -0.38905600 | -0.71071700 | -1.59828500 |
| O  | 0.54343300  | 2.52501300  | -2.30603100 |
| O  | 1.43834300  | -3.37729100 | -0.22620500 |
| O  | 2.70708900  | 0.94188800  | 1.87489100  |
| O  | 3.63956700  | -0.58264300 | -3.37722400 |
| O  | -0.40187300 | 0.06734900  | 3.62795100  |
| O  | -5.89762800 | -1.25680200 | -0.86536700 |
| O  | -1.81156200 | 2.95284500  | 2.71183100  |
| H  | -4.68232300 | 0.89430100  | -1.77204400 |
| H  | -4.06437400 | -2.97585000 | -0.07906200 |
| H  | -1.98180600 | -1.34485200 | 1.98505100  |
| H  | 1.98897300  | -0.91882700 | 3.56281100  |
| H  | 2.99294400  | 1.83801000  | -2.56380400 |
| H  | 3.78043500  | -2.17569000 | -1.28266100 |
| H  | -2.94524400 | 2.00538600  | 0.52998100  |
| H  | 0.81023400  | 3.34002700  | 2.15932300  |
| H  | -1.47946100 | 1.62379200  | -2.93003100 |
| H  | -3.00664100 | 2.24723600  | -2.34196700 |
| H  | 2.79635900  | 3.28362300  | 0.76629400  |
| H  | 2.57240200  | 3.57486400  | -0.97952500 |
| H  | 3.81401500  | -1.45961800 | 2.27799000  |
| H  | 3.87332700  | -2.69704200 | 1.02852100  |
| H  | -2.03684400 | -3.80520500 | 0.30831500  |
| H  | -0.77663900 | -3.51115500 | -0.86909000 |
| Li | -1.57297400 | 1.37500200  | 3.56277800  |
| Li | 1.03322700  | -1.83051200 | -1.23249100 |
| Li | 0.65210100  | 0.70897500  | -2.17082600 |
| Li | 1.07909600  | 0.96036100  | 2.59618400  |
| Li | -7.47435000 | -1.58217200 | -0.84115000 |
| Li | 2.47256300  | -4.10969100 | 0.96867100  |
| Li | 3.95474300  | -0.65197100 | -4.96337700 |
| Li | -2.82424000 | 3.98305500  | 1.72061200  |

## P5Q

E= -2098.040382 hartrees

| Symbol | X          | Y           | Z           |
|--------|------------|-------------|-------------|
| C      | 3.90549900 | -1.52513300 | 1.24124900  |
| C      | 4.19270900 | -0.07338700 | 1.21516300  |
| C      | 4.33496200 | 0.61353700  | 0.06562100  |
| C      | 4.19253500 | -0.10689800 | -1.24147400 |

|   |             |             |             |
|---|-------------|-------------|-------------|
| C | 3.89408800  | -1.55638000 | -1.21539000 |
| C | 3.75826800  | -2.24460000 | -0.06584400 |
| C | 4.59516900  | 2.10391800  | -0.00019900 |
| C | 3.42051300  | -3.71934400 | 0.00008100  |
| C | 3.29652300  | 2.88014100  | -0.06578000 |
| C | 2.68364000  | 3.22187100  | -1.21519300 |
| C | 1.39667100  | 3.95248400  | -1.24098900 |
| C | 0.75592400  | 4.31080300  | 0.06623100  |
| C | 1.36546000  | 3.96314900  | 1.21564300  |
| C | 2.65743000  | 3.24140300  | 1.24145400  |
| C | -0.58093600 | 5.01915500  | 0.00055100  |
| C | -1.72095700 | 4.02454500  | -0.06556700 |
| C | -2.26349700 | 3.52934400  | 1.24142300  |
| C | -3.34911400 | 2.52360300  | 1.21516200  |
| C | -3.86751000 | 2.05123000  | 0.06551900  |
| C | -3.32814900 | 2.54989300  | -1.24147500 |
| C | -2.23485500 | 3.54728200  | -1.21520500 |
| C | -4.95430300 | 0.99872000  | -0.00057700 |
| C | -4.06505700 | -1.02930100 | -1.21564100 |
| C | -3.45408300 | -2.37719600 | -1.24142900 |
| C | -3.14624000 | -3.04367400 | 0.06579100  |
| C | -3.43556600 | -2.40438400 | 1.21520900  |
| C | -4.05710500 | -1.06132700 | 1.24100200  |
| C | -4.36036000 | -0.39274600 | -0.06623200 |
| C | -2.48069300 | -4.40235500 | 0.00017400  |
| C | 1.19336800  | -4.01840300 | -1.24121200 |
| C | 1.92259300  | -3.93193200 | 0.06590200  |
| C | 1.22533400  | -4.00932200 | 1.21541700  |
| C | -0.24408800 | -4.18505000 | 1.24144400  |
| C | -0.97380700 | -4.26722600 | -0.06566500 |
| C | -0.27733200 | -4.18309100 | -1.21518500 |
| O | 1.79848700  | -3.95079000 | -2.30661700 |
| O | 3.78894600  | -2.12271500 | 2.30667500  |
| O | 0.86773900  | 4.25442500  | -2.30630000 |
| O | -1.81727500 | 3.94336900  | 2.30692600  |
| O | -3.20264200 | -2.93191200 | -2.30674200 |
| O | 4.31684600  | 0.48912300  | -2.30689900 |
| O | 3.18986200  | 2.94569400  | 2.30676800  |
| O | -3.77838500 | 2.14025600  | -2.30698600 |
| O | -4.31271700 | -0.50853300 | 2.30632100  |
| O | -0.84851900 | -4.25848600 | 2.30685100  |
| H | 4.26746900  | 0.41042400  | 2.18503100  |
| H | 3.77598600  | -2.03145100 | -2.18526800 |
| H | 5.18977600  | 2.31898700  | -0.89111100 |

|   |             |             |             |
|---|-------------|-------------|-------------|
| H | 5.14640900  | 2.41383500  | 0.89065300  |
| H | 3.88542100  | -4.14787800 | 0.89100300  |
| H | 3.80854900  | -4.21874400 | -0.89073900 |
| H | 3.09912100  | 2.96337400  | -2.18516900 |
| H | 0.92865000  | 4.18376800  | 2.18560500  |
| H | -0.60133900 | 5.65135800  | -0.89019600 |
| H | -0.70523800 | 5.63900900  | 0.89154200  |
| H | -3.69445900 | 2.17649800  | 2.18499200  |
| H | -1.85969700 | 3.86194200  | -2.18502900 |
| H | -5.56152000 | 1.17451500  | -0.89159400 |
| H | -5.58258500 | 1.07206900  | 0.89015800  |
| H | -3.21207300 | -2.83969300 | 2.18519200  |
| H | -4.24845000 | -0.57562900 | -2.18562200 |
| H | -2.83545400 | -4.92592800 | -0.89063900 |
| H | -2.74444500 | -4.97698400 | 0.89111100  |
| H | 1.70857100  | -3.93142500 | 2.18532600  |
| H | -0.76561800 | -4.21747200 | -2.18508600 |

### **P5QLi<sub>1</sub> (by condensed Fukui function)**

E= -2105.659569 hartrees

| Symbol | X           | Y           | Z           |
|--------|-------------|-------------|-------------|
| C      | 2.25355000  | 3.76367400  | -1.06310200 |
| C      | 3.41917600  | 2.88609800  | -1.14475300 |
| C      | 3.85221000  | 2.11066200  | -0.10797700 |
| C      | 3.05917200  | 2.09094000  | 1.13237600  |
| C      | 1.93829600  | 3.00963600  | 1.25022000  |
| C      | 1.54692700  | 3.82881100  | 0.24019000  |
| C      | 5.09408400  | 1.24135300  | -0.26797600 |
| C      | 0.38960100  | 4.79859200  | 0.35145800  |
| C      | 4.65924900  | -0.19793600 | -0.24674700 |
| C      | 4.65064000  | -0.90073100 | 0.91865800  |
| C      | 3.76833900  | -2.02401700 | 1.11380200  |
| C      | 3.29410900  | -2.74521400 | -0.07455800 |
| C      | 3.44115600  | -2.14419200 | -1.28561200 |
| C      | 4.04739300  | -0.80607400 | -1.44966100 |
| C      | 2.61350700  | -4.08877300 | 0.12745500  |
| C      | 1.10373900  | -4.00030500 | 0.14529800  |
| C      | 0.39724900  | -4.09153700 | -1.17463400 |
| C      | -1.08092600 | -4.01516200 | -1.18810600 |
| C      | -1.80847000 | -3.89134100 | -0.06182300 |
| C      | -1.10389900 | -3.79784300 | 1.25769500  |
| C      | 0.37423200  | -3.85699400 | 1.26852800  |

|   |             |             |             |
|---|-------------|-------------|-------------|
| C | -3.32037700 | -3.80175100 | -0.04277400 |
| C | -4.06656300 | -1.67520200 | 1.09108900  |
| C | -4.46095900 | -0.24986200 | 1.07078600  |
| C | -4.49840200 | 0.45888700  | -0.24994500 |
| C | -4.22510400 | -0.22963300 | -1.37484300 |
| C | -3.87480100 | -1.66749000 | -1.35872300 |
| C | -3.77925900 | -2.35957100 | -0.03188600 |
| C | -4.78604100 | 1.94423300  | -0.21825200 |
| C | -1.65869300 | 3.63406300  | 1.37062500  |
| C | -0.93964600 | 4.10755100  | 0.14412200  |
| C | -1.47509700 | 3.86344600  | -1.06832400 |
| C | -2.75862900 | 3.14981900  | -1.23920100 |
| C | -3.49734100 | 2.71272800  | -0.00783500 |
| C | -2.96397300 | 2.95900000  | 1.20371000  |
| O | -1.17326300 | 3.78621200  | 2.48843100  |
| O | 1.88055600  | 4.44379200  | -2.03130800 |
| O | 3.33251400  | -2.26401600 | 2.28743800  |
| O | 1.02563000  | -4.23535100 | -2.21843400 |
| O | -4.73764100 | 0.33762300  | 2.11231700  |
| O | 3.32042500  | 1.31465800  | 2.10668900  |
| O | 4.05823300  | -0.22993700 | -2.54373300 |
| O | -1.73459300 | -3.68017700 | 2.30464200  |
| O | -3.65864000 | -2.27498900 | -2.40258400 |
| O | -3.20995200 | 2.91760900  | -2.35669000 |
| H | 3.94422000  | 2.88834700  | -2.09508500 |
| H | 1.41638000  | 3.00966800  | 2.20409000  |
| H | 5.79930200  | 1.43012300  | 0.54982800  |
| H | 5.57871600  | 1.49323100  | -1.21433900 |
| H | 0.51765300  | 5.56908600  | -0.41233700 |
| H | 0.39315900  | 5.25869300  | 1.34278300  |
| H | 5.13893500  | -0.49545300 | 1.80249800  |
| H | 3.06181000  | -2.60955200 | -2.19101300 |
| H | 2.95335100  | -4.51787000 | 1.07349100  |
| H | 2.90966400  | -4.75424700 | -0.68829200 |
| H | -1.54551200 | -4.05961600 | -2.16899600 |
| H | 0.84167900  | -3.78512800 | 2.24702900  |
| H | -3.69399400 | -4.30587300 | 0.85192100  |
| H | -3.72026300 | -4.29496800 | -0.93202200 |
| H | -4.22824200 | 0.24471800  | -2.35246000 |
| H | -3.99979600 | -2.13212700 | 2.07416000  |
| H | -5.47602100 | 2.15620300  | 0.60203600  |
| H | -5.23332100 | 2.25237500  | -1.16561500 |
| H | -0.97373900 | 4.16672200  | -1.98383100 |
| H | -3.45035200 | 2.63717400  | 2.12027400  |

Li                    3.10450800   -0.39003700   2.72869100

**P5QLi<sub>2</sub> (by condensed Fukui function)**

E= -2113.337714 hartrees

| Symbol | X           | Y           | Z           |
|--------|-------------|-------------|-------------|
| C      | -3.22146400 | -2.76135200 | -1.00418200 |
| C      | -4.40481800 | -1.97825100 | -0.87183500 |
| C      | -4.63419600 | -1.14603300 | 0.20576200  |
| C      | -3.71552200 | -1.20088200 | 1.33589600  |
| C      | -2.71711400 | -2.26260200 | 1.32067600  |
| C      | -2.48204900 | -3.04785800 | 0.22642300  |
| C      | -5.59671500 | 0.00019900  | -0.00106800 |
| C      | -1.50836200 | -4.21327700 | 0.20991200  |
| C      | -4.63392400 | 1.14636000  | -0.20705200 |
| C      | -4.40549100 | 1.97873500  | 0.87060200  |
| C      | -3.22221500 | 2.76181100  | 1.00395200  |
| C      | -2.48154100 | 3.04794300  | -0.22598000 |
| C      | -2.71560200 | 2.26241800  | -1.32029700 |
| C      | -3.71418100 | 1.20095500  | -1.33629200 |
| C      | -1.50774800 | 4.21328100  | -0.20856700 |
| C      | -0.04939400 | 3.84094300  | -0.07370400 |
| C      | 0.73574000  | 3.67832900  | -1.33981200 |
| C      | 2.18865500  | 3.41739600  | -1.23757300 |
| C      | 2.81523600  | 3.28232000  | -0.05338700 |
| C      | 2.01797500  | 3.37927800  | 1.21399800  |
| C      | 0.57392600  | 3.67640500  | 1.10962400  |
| C      | 4.28811200  | 2.95328100  | 0.08422700  |
| C      | 4.48802000  | 0.71906100  | 1.23810300  |
| C      | 4.52638900  | -0.75873400 | 1.21958700  |
| C      | 4.46077300  | -1.45181400 | -0.10896700 |
| C      | 4.48752200  | -0.71947200 | -1.23840000 |
| C      | 4.52619300  | 0.75831100  | -1.21990200 |
| C      | 4.46111000  | 1.45141000  | 0.10867900  |
| C      | 4.28749300  | -2.95364800 | -0.08453300 |
| C      | 0.73541300  | -3.67824100 | 1.34047200  |
| C      | -0.05002300 | -3.84097900 | 0.07454400  |
| C      | 0.57298500  | -3.67646100 | -1.10894700 |
| C      | 2.01699600  | -3.37935000 | -1.21368300 |
| C      | 2.81460400  | -3.28248400 | 0.05348200  |
| C      | 2.18832700  | -3.41743800 | 1.23784400  |
| O      | 0.19168400  | -3.75874400 | 2.43807000  |
| O      | -2.79141600 | -3.09624600 | -2.16777400 |

|    |             |             |             |
|----|-------------|-------------|-------------|
| O  | -2.79339300 | 3.09688200  | 2.16796800  |
| O  | 0.19174800  | 3.75896200  | -2.43727800 |
| O  | 4.58367200  | -1.40019400 | 2.26422000  |
| O  | -3.76598300 | -0.38510300 | 2.32103000  |
| O  | -3.76400900 | 0.38497800  | -2.32138800 |
| O  | 2.55455600  | 3.22784500  | 2.30807400  |
| O  | 4.58325500  | 1.39976300  | -2.26455000 |
| O  | 2.55330500  | -3.22788900 | -2.30789800 |
| H  | -5.06668200 | -1.92693500 | -1.73413400 |
| H  | -2.14275300 | -2.40517800 | 2.23288600  |
| H  | -6.23401900 | 0.19629800  | 0.86613900  |
| H  | -6.23325300 | -0.19582200 | -0.86884900 |
| H  | -1.77503700 | -4.86331400 | -0.62760100 |
| H  | -1.62839900 | -4.77348400 | 1.14174600  |
| H  | -5.06820100 | 1.92772800  | 1.73228100  |
| H  | -2.14033700 | 2.40473700  | -2.23197400 |
| H  | -1.77434600 | 4.86250300  | 0.62959000  |
| H  | -1.62792700 | 4.77438000  | -1.13986700 |
| H  | 2.71755900  | 3.31603700  | -2.18103100 |
| H  | 0.03706400  | 3.76986400  | 2.05020700  |
| H  | 4.66739900  | 3.38441800  | 1.01331100  |
| H  | 4.83603100  | 3.36649900  | -0.76584300 |
| H  | 4.43923400  | -1.17912000 | -2.22143800 |
| H  | 4.44010100  | 1.17870700  | 2.22115900  |
| H  | 4.83560000  | -3.36703300 | 0.76533700  |
| H  | 4.66643100  | -3.38478800 | -1.01375800 |
| H  | 0.03582100  | -3.76988200 | -2.04935600 |
| H  | 2.71750500  | -3.31608500 | 2.18114900  |
| Li | -3.13486500 | 1.28438700  | 2.75400200  |
| Li | -3.13173800 | -1.28402600 | -2.75445200 |

### P5QLi<sub>3</sub> (by condensed Fukui function)

E= -2120.955661 hartrees

| Symbol | X           | Y           | Z           |
|--------|-------------|-------------|-------------|
| C      | 1.88569700  | -4.01686200 | 0.95308100  |
| C      | 3.22749800  | -3.50622000 | 0.94477200  |
| C      | 3.67695400  | -2.67003800 | -0.04396000 |
| C      | 2.83452100  | -2.48192200 | -1.21559900 |
| C      | 1.69599300  | -3.36081900 | -1.36752100 |
| C      | 1.20427300  | -4.10766800 | -0.32488700 |
| C      | 4.85752800  | -1.76528300 | 0.25109800  |
| C      | -0.08885000 | -4.89952700 | -0.40171900 |



|   |             |             |             |
|---|-------------|-------------|-------------|
| C | 4.40066900  | -0.31946700 | 0.38991700  |
| C | 5.03555200  | 0.66153600  | -0.39418700 |
| C | 4.57213200  | 1.98897800  | -0.52700700 |
| C | 3.34956500  | 2.30514300  | 0.13625100  |
| C | 2.73492600  | 1.34476700  | 0.95135200  |
| C | 3.24714400  | 0.03168300  | 1.17810500  |
| C | 2.81199200  | 3.72585000  | 0.00852700  |
| C | 1.31142600  | 3.85072200  | -0.05386400 |
| C | 0.56737900  | 4.06860600  | 1.23197100  |
| C | -0.91151200 | 4.13979200  | 1.18971400  |
| C | -1.60549800 | 4.08665500  | 0.03746900  |
| C | -0.86339400 | 3.93812300  | -1.25543900 |
| C | 0.60811100  | 3.81744200  | -1.20391700 |
| C | -3.11753900 | 4.12108800  | -0.03898500 |
| C | -3.96487400 | 2.04450300  | -1.19632700 |
| C | -4.45031900 | 0.64671000  | -1.18713300 |
| C | -4.56456100 | -0.05647300 | 0.13193300  |
| C | -4.28483300 | 0.61744500  | 1.26400400  |
| C | -3.85746200 | 2.03355800  | 1.25847100  |
| C | -3.67433300 | 2.71406800  | -0.06514400 |
| C | -4.95105200 | -1.51846300 | 0.09490600  |
| C | -2.02459100 | -3.57345800 | -1.45652200 |
| C | -1.31907500 | -4.03832100 | -0.21829500 |
| C | -1.79448900 | -3.66138900 | 0.98631800  |
| C | -2.99571900 | -2.81793000 | 1.14049400  |
| C | -3.72638000 | -2.38975800 | -0.09784200 |
| C | -3.24567000 | -2.74898600 | -1.30271200 |
| O | -1.60949200 | -3.86482100 | -2.57401900 |
| O | 1.28688200  | -4.17650200 | 2.08057800  |
| O | 5.24127500  | 2.88702600  | -1.24102100 |
| O | 1.16646600  | 4.19299700  | 2.29433800  |
| O | -4.74205700 | 0.07830200  | -2.23492100 |
| O | 3.03305100  | -1.52830500 | -2.05837000 |
| O | 2.65798100  | -0.77833300 | 2.01309900  |
| O | -1.45983800 | 3.91827700  | -2.32922400 |
| O | -3.65128500 | 2.63362800  | 2.30904800  |
| O | -3.39315600 | -2.47549900 | 2.25207600  |
| H | 3.78744400  | -3.59474100 | 1.87562400  |
| H | 1.15736500  | -3.30846200 | -2.31067500 |
| H | 5.60680800  | -1.81889200 | -0.54773900 |
| H | 5.33781500  | -2.11932000 | 1.17205000  |
| H | -0.07830100 | -5.66625700 | 0.37795500  |
| H | -0.15186500 | -5.38773000 | -1.37786100 |
| H | 5.91501200  | 0.38170600  | -0.97204000 |

|    |             |             |             |
|----|-------------|-------------|-------------|
| H  | 1.83290700  | 1.60074600  | 1.49953000  |
| H  | 3.24745700  | 4.16452300  | -0.89381700 |
| H  | 3.16745300  | 4.31390100  | 0.86415400  |
| H  | -1.40541700 | 4.23232900  | 2.15274400  |
| H  | 1.09300200  | 3.70020900  | -2.17082400 |
| H  | -3.41695600 | 4.64728500  | -0.94857500 |
| H  | -3.51277600 | 4.64522900  | 0.83448600  |
| H  | -4.34344100 | 0.14471100  | 2.24033800  |
| H  | -3.83635100 | 2.49268500  | -2.17737500 |
| H  | -5.64474500 | -1.68092600 | -0.73357100 |
| H  | -5.43384100 | -1.79038700 | 1.03632900  |
| H  | -1.29535700 | -3.96043100 | 1.90398500  |
| H  | -3.72180600 | -2.43484500 | -2.22737100 |
| Li | 3.09255300  | 0.15027300  | -1.32722500 |
| Li | 1.88896100  | -2.28799700 | 2.48273300  |
| Li | 6.34171500  | 3.84438100  | -1.98016800 |

### P5QLi<sub>4</sub> (by condensed Fukui function)

E= -2128.608294 hartrees

| Symbol | X           | Y           | Z           |
|--------|-------------|-------------|-------------|
| C      | -4.12639100 | -0.59974500 | 1.17432600  |
| C      | -3.17661800 | -1.65824400 | 1.44091200  |
| C      | -2.98571200 | -2.73338400 | 0.61201600  |
| C      | -3.81808400 | -2.86242200 | -0.58596800 |
| C      | -4.64165100 | -1.75067900 | -0.92566100 |
| C      | -4.79204300 | -0.63519800 | -0.12638900 |
| C      | -1.96789800 | -3.81284000 | 0.90969100  |
| C      | -5.39562100 | 0.61506800  | -0.72498200 |
| C      | -0.51787400 | -3.56176700 | 0.47927300  |
| C      | 0.48933400  | -3.93224900 | 1.35826800  |
| C      | 1.88001300  | -3.82868900 | 1.06719100  |
| C      | 2.23316800  | -3.31917800 | -0.22670400 |
| C      | 1.22115600  | -2.93357400 | -1.10599900 |
| C      | -0.14708700 | -3.03386200 | -0.80197200 |
| C      | 3.69097000  | -3.21286300 | -0.65439600 |
| C      | 4.14318600  | -1.77330200 | -0.57867700 |
| C      | 4.58321500  | -1.20046300 | 0.71303700  |
| C      | 4.77852600  | 0.24293100  | 0.81528600  |
| C      | 4.65241700  | 1.06734500  | -0.24941500 |
| C      | 4.36525600  | 0.48720900  | -1.59426400 |
| C      | 4.10288400  | -0.95145600 | -1.66126700 |
| C      | 4.70918900  | 2.57414400  | -0.14996900 |

|    |             |             |             |
|----|-------------|-------------|-------------|
| C  | 2.56994500  | 3.50594800  | -1.11078200 |
| C  | 1.15955700  | 3.93469400  | -0.99275600 |
| C  | 0.49841600  | 3.85984500  | 0.35075200  |
| C  | 1.23349700  | 3.47622800  | 1.41290000  |
| C  | 2.65754500  | 3.09059500  | 1.30723500  |
| C  | 3.29361000  | 3.10239700  | -0.04884700 |
| C  | -0.94315200 | 4.28841700  | 0.45368600  |
| C  | -2.99888700 | 1.44060700  | -1.29435800 |
| C  | -4.27398200 | 1.62226600  | -0.62145000 |
| C  | -4.34409900 | 2.54653100  | 0.39808200  |
| C  | -3.19778300 | 3.21786600  | 0.92544900  |
| C  | -1.99755500 | 3.25993800  | 0.07945900  |
| C  | -1.93318600 | 2.38930100  | -0.96938700 |
| O  | -2.77980000 | 0.52143100  | -2.15448000 |
| O  | -4.34090400 | 0.30656600  | 2.05717800  |
| O  | 2.76192300  | -4.19799300 | 1.94967700  |
| O  | 4.80852900  | -1.91250700 | 1.72222800  |
| O  | 0.54207600  | 4.33718800  | -1.97463400 |
| O  | -3.75845900 | -3.90152400 | -1.34242200 |
| O  | -1.06928000 | -2.67913100 | -1.72635400 |
| O  | 4.34274800  | 1.20083000  | -2.60213900 |
| O  | 3.29730500  | 2.77353400  | 2.30619400  |
| O  | -3.20728400 | 3.64883400  | 2.13354000  |
| H  | -2.60991700 | -1.57060700 | 2.36590300  |
| H  | -5.14798300 | -1.79775700 | -1.88675900 |
| H  | -2.33140500 | -4.74407300 | 0.45157600  |
| H  | -1.95512700 | -3.99852200 | 1.98866600  |
| H  | -6.26911700 | 0.98150400  | -0.17465900 |
| H  | -5.69974900 | 0.41514700  | -1.75668700 |
| H  | 0.23430600  | -4.32706000 | 2.33891800  |
| H  | 1.47604200  | -2.55606100 | -2.09458800 |
| H  | 3.80342700  | -3.56145000 | -1.68731700 |
| H  | 4.31047300  | -3.85898200 | -0.02389200 |
| H  | 4.98989200  | 0.62633400  | 1.80909600  |
| H  | 3.85014300  | -1.33140100 | -2.64738200 |
| H  | 5.18687300  | 2.97870700  | -1.04541600 |
| H  | 5.27274800  | 2.86982400  | 0.73819000  |
| H  | 0.81833800  | 3.44066800  | 2.41723200  |
| H  | 2.98214700  | 3.50993400  | -2.11542900 |
| H  | -1.08639600 | 5.15891700  | -0.20042600 |
| H  | -1.15319900 | 4.60602600  | 1.47835100  |
| H  | -5.27558800 | 2.66568300  | 0.94810500  |
| H  | -1.05975400 | 2.34882200  | -1.61264900 |
| Li | -2.14567600 | -4.08908300 | -2.08501300 |

|    |             |             |             |
|----|-------------|-------------|-------------|
| Li | -1.94826900 | -1.08779100 | -1.90973200 |
| Li | 4.25681100  | -3.47802300 | 2.42715600  |
| Li | -3.87505100 | 1.93424600  | 2.67190100  |

**P5QLi<sub>5</sub> (by condensed Fukui function)**

E= -2136.225021 hartrees

| Symbol | X           | Y           | Z           |
|--------|-------------|-------------|-------------|
| C      | 4.12101000  | 0.42202800  | 1.17688700  |
| C      | 3.26439800  | 1.56422000  | 1.39570800  |
| C      | 3.16287500  | 2.61613600  | 0.51811100  |
| C      | 3.98720500  | 2.62554100  | -0.68509500 |
| C      | 4.72541700  | 1.44489800  | -0.96755600 |
| C      | 4.79290500  | 0.35722000  | -0.11479100 |
| C      | 2.23168600  | 3.78507800  | 0.75898100  |
| C      | 5.33190900  | -0.95038600 | -0.65021000 |
| C      | 0.77047600  | 3.60587600  | 0.34022500  |
| C      | -0.22610900 | 4.09860600  | 1.20482100  |
| C      | -1.61117800 | 4.02856900  | 0.93442300  |
| C      | -2.03012600 | 3.40945700  | -0.26990400 |
| C      | -1.04080600 | 2.91234900  | -1.11696200 |
| C      | 0.34655300  | 2.99955400  | -0.86827000 |
| C      | -3.50083000 | 3.25600900  | -0.65171700 |
| C      | -3.99267800 | 1.82111900  | -0.55894300 |
| C      | -4.40571700 | 1.28122200  | 0.72301100  |
| C      | -4.72779900 | -0.11221300 | 0.79351000  |
| C      | -4.67394700 | -0.94045500 | -0.29856100 |
| C      | -4.32477300 | -0.40409300 | -1.61528800 |
| C      | -4.00002700 | 1.00950900  | -1.66556300 |
| C      | -4.85757400 | -2.44115300 | -0.19227500 |
| C      | -2.74956900 | -3.47047100 | -1.11925400 |
| C      | -1.36483000 | -3.94800600 | -0.98542700 |
| C      | -0.73088400 | -3.92922800 | 0.37392400  |
| C      | -1.47200400 | -3.54875800 | 1.43141200  |
| C      | -2.88324600 | -3.11428100 | 1.30626900  |
| C      | -3.48405400 | -3.05700000 | -0.06296700 |
| C      | 0.69368000  | -4.41469800 | 0.49626400  |
| C      | 2.90972100  | -1.69139200 | -1.24990300 |
| C      | 4.16103200  | -1.89707000 | -0.53210600 |
| C      | 4.15728500  | -2.77828000 | 0.52239500  |
| C      | 2.95924500  | -3.37732100 | 1.03451800  |
| C      | 1.79256800  | -3.42942500 | 0.13820300  |
| C      | 1.80101300  | -2.59855200 | -0.94249900 |

|    |             |             |             |
|----|-------------|-------------|-------------|
| O  | 2.75013300  | -0.78360500 | -2.13061600 |
| O  | 4.25179400  | -0.47078100 | 2.09563400  |
| O  | -2.46966800 | 4.64092800  | 1.81079200  |
| O  | -4.46832500 | 2.01739400  | 1.78410100  |
| O  | -0.72618800 | -4.34971700 | -1.95900500 |
| O  | 3.98949500  | 3.63276800  | -1.49665900 |
| O  | 1.21176400  | 2.52114500  | -1.79059000 |
| O  | -4.28196700 | -1.12904700 | -2.64139100 |
| O  | -3.52897700 | -2.82367500 | 2.30993700  |
| O  | 2.90586800  | -3.73440400 | 2.26034000  |
| H  | 2.69085900  | 1.56223500  | 2.32079800  |
| H  | 5.23839100  | 1.40849200  | -1.92560800 |
| H  | 2.66151900  | 4.65495100  | 0.24282200  |
| H  | 2.23970300  | 4.03030200  | 1.82777400  |
| H  | 6.17468700  | -1.33999600 | -0.06843400 |
| H  | 5.66490500  | -0.81197500 | -1.68308900 |
| H  | 0.07687400  | 4.44599200  | 2.19829800  |
| H  | -1.33769600 | 2.42523100  | -2.04290700 |
| H  | -3.62691500 | 3.59785300  | -1.68600700 |
| H  | -4.11371300 | 3.91451200  | -0.02665400 |
| H  | -4.97823000 | -0.50589200 | 1.77495200  |
| H  | -3.72399300 | 1.39436700  | -2.64522700 |
| H  | -5.34341900 | -2.81547500 | -1.09669300 |
| H  | -5.45837700 | -2.69198500 | 0.68562900  |
| H  | -1.07818400 | -3.55473800 | 2.44533300  |
| H  | -3.14292100 | -3.42184400 | -2.12966700 |
| H  | 0.81208300  | -5.28463900 | -0.16381600 |
| H  | 0.87456700  | -4.74625800 | 1.52191800  |
| H  | 5.06160400  | -2.91519200 | 1.11170600  |
| H  | 0.95798700  | -2.56171600 | -1.62514100 |
| Li | 2.43282900  | 3.73316600  | -2.34527100 |
| Li | 1.94240900  | 0.84208700  | -1.87204300 |
| Li | -3.74477900 | 3.48393700  | 2.36463500  |
| Li | 3.64782700  | -2.02667600 | 2.75507300  |
| Li | -1.45099600 | 6.04750900  | 1.56942100  |

### P5QLi<sub>6</sub> (by condensed Fukui function)

E= -2143.830155 hartrees

| Symbol | X          | Y          | Z          |
|--------|------------|------------|------------|
| C      | 4.23025300 | 0.21891300 | 1.15081400 |
| C      | 3.44688200 | 1.41090800 | 1.35762700 |
| C      | 3.39451900 | 2.45344100 | 0.46114300 |

|   |             |             |             |
|---|-------------|-------------|-------------|
| C | 4.20789400  | 2.40083500  | -0.74433700 |
| C | 4.85793400  | 1.16875900  | -1.01952500 |
| C | 4.86769800  | 0.08864100  | -0.14914700 |
| C | 2.50750000  | 3.66093700  | 0.68383500  |
| C | 5.30964900  | -1.26152600 | -0.67348100 |
| C | 1.03665600  | 3.50368900  | 0.29468800  |
| C | 0.05412700  | 3.98406500  | 1.18117400  |
| C | -1.33441400 | 3.93496600  | 0.91979700  |
| C | -1.76920400 | 3.34708200  | -0.29235300 |
| C | -0.79489800 | 2.85228600  | -1.15853500 |
| C | 0.59471600  | 2.92278800  | -0.92190900 |
| C | -3.24111800 | 3.25963400  | -0.68336100 |
| C | -3.84937900 | 1.86390000  | -0.62997200 |
| C | -4.46652100 | 1.36625700  | 0.56964100  |
| C | -5.09588600 | 0.10956600  | 0.51741400  |
| C | -4.90540300 | -0.78897300 | -0.52109200 |
| C | -4.24799400 | -0.34661800 | -1.74303600 |
| C | -3.80190200 | 1.04189800  | -1.73638000 |
| C | -5.08968300 | -2.25977700 | -0.27569300 |
| C | -3.01897000 | -3.48283700 | -0.97459600 |
| C | -1.64775900 | -3.94944200 | -0.82867900 |
| C | -0.96049100 | -3.64194500 | 0.45431900  |
| C | -1.59846000 | -2.88519900 | 1.38094400  |
| C | -2.94694400 | -2.36456200 | 1.19313500  |
| C | -3.68026700 | -2.76694600 | -0.01153200 |
| C | 0.40614800  | -4.23963400 | 0.68028300  |
| C | 2.83476900  | -1.83932400 | -1.22733800 |
| C | 4.07961400  | -2.12542000 | -0.52070700 |
| C | 4.02889000  | -2.98499900 | 0.54879500  |
| C | 2.79412600  | -3.45951500 | 1.10494400  |
| C | 1.59749500  | -3.40933900 | 0.24946400  |
| C | 1.65329700  | -2.62016500 | -0.86059000 |
| O | 2.74725100  | -0.95616900 | -2.14160800 |
| O | 4.32288300  | -0.66448900 | 2.08789400  |
| O | -2.18258900 | 4.54863700  | 1.80974300  |
| O | -4.33697500 | 1.95056500  | 1.78102300  |
| O | -1.06483100 | -4.60687600 | -1.70703600 |
| O | 4.27318700  | 3.40126200  | -1.56845500 |
| O | 1.44376800  | 2.45638200  | -1.85860100 |
| O | -4.05427800 | -1.10920300 | -2.72067100 |
| O | -3.42524900 | -1.60619000 | 2.10035500  |
| O | 2.74457300  | -3.78745200 | 2.33930200  |
| H | 2.88193600  | 1.45741300  | 2.28716300  |
| H | 5.35860300  | 1.08495100  | -1.98151700 |

|    |             |             |             |
|----|-------------|-------------|-------------|
| H  | 2.95035300  | 4.49933000  | 0.12820100  |
| H  | 2.54251700  | 3.94356100  | 1.74319100  |
| H  | 6.13453300  | -1.69766900 | -0.09899500 |
| H  | 5.63274900  | -1.16081700 | -1.71386300 |
| H  | 0.37192000  | 4.30955900  | 2.17794500  |
| H  | -1.10417000 | 2.39302900  | -2.09417900 |
| H  | -3.33930600 | 3.62212900  | -1.71348700 |
| H  | -3.82739600 | 3.95714700  | -0.07089800 |
| H  | -5.63650600 | -0.22170300 | 1.40608800  |
| H  | -3.35510000 | 1.39435300  | -2.66366100 |
| H  | -5.49687100 | -2.77840300 | -1.14778200 |
| H  | -5.74590400 | -2.43600800 | 0.58451600  |
| H  | -1.12732300 | -2.63408600 | 2.32974500  |
| H  | -3.51441200 | -3.74403100 | -1.90285200 |
| H  | 0.45083300  | -5.18404600 | 0.12094500  |
| H  | 0.53836100  | -4.47253600 | 1.74084500  |
| H  | 4.93160200  | -3.18206500 | 1.12357800  |
| H  | 0.79063900  | -2.51623900 | -1.51273100 |
| Li | 2.73995300  | 3.58073400  | -2.43112200 |
| Li | 2.14457600  | 0.75217800  | -1.88373400 |
| Li | -3.61251400 | 3.51550600  | 2.16684600  |
| Li | 3.64338000  | -2.15516700 | 2.78943600  |
| Li | -1.11432600 | 5.93118600  | 1.59887900  |
| Li | -3.76647500 | 0.16900100  | 2.30224300  |

### P5QLi<sub>7</sub> (by condensed Fukui function)

E= -2151.451751 hartrees

| Symbol | X           | Y           | Z           |
|--------|-------------|-------------|-------------|
| C      | 4.07880200  | -0.46713000 | 1.25648900  |
| C      | 3.70356500  | 0.91427900  | 1.42981000  |
| C      | 3.99768200  | 1.89920500  | 0.52077600  |
| C      | 4.82692500  | 1.57548300  | -0.62814100 |
| C      | 5.12881300  | 0.19344500  | -0.84741100 |
| C      | 4.71913600  | -0.81872600 | -0.01150200 |
| C      | 3.40469000  | 3.28832800  | 0.62752800  |
| C      | 4.79747200  | -2.25541800 | -0.49718100 |
| C      | 1.93206700  | 3.37512000  | 0.22586200  |
| C      | 1.03389400  | 4.03945300  | 1.08250100  |
| C      | -0.34692700 | 4.18228300  | 0.81443000  |
| C      | -0.86580500 | 3.61090700  | -0.37461900 |
| C      | 0.02683900  | 2.94284000  | -1.21161200 |
| C      | 1.40924400  | 2.81146100  | -0.96413800 |

|   |             |             |             |
|---|-------------|-------------|-------------|
| C | -2.33093100 | 3.73775300  | -0.77524300 |
| C | -3.19622800 | 2.48968700  | -0.63480800 |
| C | -3.94659200 | 2.23875900  | 0.54425400  |
| C | -4.86182700 | 1.18138300  | 0.50004000  |
| C | -4.86348400 | 0.19318500  | -0.48729500 |
| C | -4.00624000 | 0.34415800  | -1.62302700 |
| C | -3.28074800 | 1.57198700  | -1.68374500 |
| C | -5.50731300 | -1.12533800 | -0.09958000 |
| C | -3.93808700 | -2.91023400 | -0.73754800 |
| C | -2.61115300 | -3.44024700 | -0.81634800 |
| C | -1.84273400 | -3.45788100 | 0.41330300  |
| C | -2.28209900 | -2.67070900 | 1.45240300  |
| C | -3.44843800 | -1.81801500 | 1.37399700  |
| C | -4.33887200 | -2.03233600 | 0.24075700  |
| C | -0.61872100 | -4.34557400 | 0.52110600  |
| C | 2.29351300  | -2.39959000 | -1.18874300 |
| C | 3.42026800  | -2.87974800 | -0.40858700 |
| C | 3.16541900  | -3.73570800 | 0.63250400  |
| C | 1.83550100  | -3.99175600 | 1.10677700  |
| C | 0.73478900  | -3.75253800 | 0.18154100  |
| C | 0.99689000  | -2.98860500 | -0.92671700 |
| O | 2.42248200  | -1.46591500 | -2.06510700 |
| O | 3.80947700  | -1.32168000 | 2.17324400  |
| O | -1.09204600 | 4.95303600  | 1.66870200  |
| O | -3.71407800 | 2.81786200  | 1.75736800  |
| O | -2.12084600 | -3.73609100 | -1.97294000 |
| O | 5.17863200  | 2.46879900  | -1.49070100 |
| O | 2.18160000  | 2.16367700  | -1.86636000 |
| O | -3.85633900 | -0.57165700 | -2.55134300 |
| O | -3.65026100 | -0.92451900 | 2.28215200  |
| O | 1.67086200  | -4.24061700 | 2.35879500  |
| H | 3.11491700  | 1.13869600  | 2.31696300  |
| H | 5.63456300  | -0.04529600 | -1.78032700 |
| H | 4.01400600  | 3.96623800  | 0.01470900  |
| H | 3.49563100  | 3.64745000  | 1.65984100  |
| H | 5.48978900  | -2.84675800 | 0.11451400  |
| H | 5.17909200  | -2.25367800 | -1.52336700 |
| H | 1.39528000  | 4.35872900  | 2.06595100  |
| H | -0.34780000 | 2.50351300  | -2.13317500 |
| H | -2.35998900 | 4.04013900  | -1.82949500 |
| H | -2.78457400 | 4.56752500  | -0.21781900 |
| H | -5.51461600 | 1.04741300  | 1.36525400  |
| H | -2.70759100 | 1.74558700  | -2.59356800 |
| H | -6.08187200 | -1.57418700 | -0.91707400 |



|    |             |             |             |
|----|-------------|-------------|-------------|
| H  | -6.18112800 | -0.97481400 | 0.75095100  |
| H  | -1.71020400 | -2.61595700 | 2.37708800  |
| H  | -4.58217400 | -3.06449000 | -1.60214500 |
| H  | -0.76695300 | -5.20937900 | -0.14087500 |
| H  | -0.55539000 | -4.72904600 | 1.54380500  |
| H  | 3.98469300  | -4.07081900 | 1.26876100  |
| H  | 0.19356700  | -2.74977700 | -1.61819700 |
| Li | 3.71844600  | 2.92222700  | -2.41929500 |
| Li | 2.24498300  | 0.31707200  | -1.89090200 |
| Li | -2.66754500 | 4.17580900  | 2.09907800  |
| Li | 2.81795300  | -2.73529500 | 2.74128700  |
| Li | 0.14901200  | 6.16268300  | 1.39101300  |
| Li | -3.60261700 | 0.90475800  | 2.26904200  |
| Li | -2.94722500 | -2.08899000 | -2.69664600 |

### **P5QLi<sub>8</sub> (by condensed Fukui function)**

E= -2159.049885 hartrees

| Symbol | X           | Y           | Z           |
|--------|-------------|-------------|-------------|
| C      | 3.75627100  | -1.64222000 | 0.97742400  |
| C      | 3.80018800  | -0.28277400 | 1.44556400  |
| C      | 4.38734300  | 0.75087300  | 0.73827000  |
| C      | 5.11961600  | 0.45011000  | -0.47493100 |
| C      | 4.81475800  | -0.80958100 | -1.06938900 |
| C      | 4.07680700  | -1.80771000 | -0.43643700 |
| C      | 4.16246100  | 2.20568700  | 1.10525600  |
| C      | 3.46386600  | -2.91513600 | -1.27716400 |
| C      | 2.82584700  | 2.75755700  | 0.59373100  |
| C      | 1.95284000  | 3.41215400  | 1.48762100  |
| C      | 0.68685300  | 3.93332900  | 1.12247600  |
| C      | 0.27652900  | 3.80324100  | -0.22471700 |
| C      | 1.14467900  | 3.17422500  | -1.10754800 |
| C      | 2.38629100  | 2.61517600  | -0.75107600 |
| C      | -1.08773900 | 4.22375100  | -0.73136600 |
| C      | -2.12169900 | 3.10195600  | -0.76564900 |
| C      | -3.24579600 | 3.12168900  | 0.09073300  |
| C      | -4.29765000 | 2.26170600  | -0.25479800 |
| C      | -4.15736700 | 1.13113900  | -1.06564200 |
| C      | -2.89759700 | 0.91781800  | -1.70229300 |
| C      | -2.00155300 | 2.02076500  | -1.65055500 |
| C      | -5.29241000 | 0.12550500  | -0.92247500 |
| C      | -4.50884800 | -2.19464800 | -0.75920800 |
| C      | -3.46966700 | -3.10446400 | -0.39207300 |

|    |             |             |             |
|----|-------------|-------------|-------------|
| C  | -2.88727500 | -2.93775900 | 0.92524000  |
| C  | -3.28038900 | -1.85797300 | 1.68972300  |
| C  | -4.16281600 | -0.82157700 | 1.22443200  |
| C  | -4.74911200 | -1.01448500 | -0.09104500 |
| C  | -1.73520800 | -3.82346400 | 1.31251900  |
| C  | 0.99231600  | -2.12856100 | -0.91581600 |
| C  | 2.03003400  | -3.11097500 | -0.82221300 |
| C  | 1.82182100  | -4.20288200 | 0.00716800  |
| C  | 0.71234400  | -4.32879900 | 0.88978100  |
| C  | -0.42930600 | -3.49063400 | 0.60755500  |
| C  | -0.23258400 | -2.41410600 | -0.23020700 |
| O  | 1.07893700  | -0.98747400 | -1.61648200 |
| O  | 3.41870600  | -2.60301500 | 1.76594000  |
| O  | -0.03776600 | 4.62478400  | 2.06065100  |
| O  | -3.31782500 | 3.77835300  | 1.27467000  |
| O  | -2.93888900 | -3.83081600 | -1.31733200 |
| O  | 5.87085200  | 1.32555000  | -1.07381800 |
| O  | 3.05635400  | 1.93740900  | -1.69367100 |
| O  | -2.47647500 | -0.22299600 | -2.30097600 |
| O  | -4.35335900 | 0.24203600  | 1.93643500  |
| O  | 0.81898400  | -5.03372300 | 1.96989500  |
| H  | 3.32303100  | -0.09054700 | 2.40526000  |
| H  | 5.15796200  | -0.96869900 | -2.09243100 |
| H  | 4.99279900  | 2.79364500  | 0.69336900  |
| H  | 4.19118500  | 2.33516700  | 2.19445300  |
| H  | 3.99526300  | -3.86902600 | -1.16954200 |
| H  | 3.53910300  | -2.63149600 | -2.33444900 |
| H  | 2.20575800  | 3.39408600  | 2.55435600  |
| H  | 0.86532300  | 3.07991400  | -2.15436400 |
| H  | -0.96894900 | 4.60598800  | -1.75356600 |
| H  | -1.48425800 | 5.06654700  | -0.15144200 |
| H  | -5.24522100 | 2.40018000  | 0.26727800  |
| H  | -1.14195700 | 1.99744800  | -2.32358200 |
| H  | -5.62908900 | -0.26484700 | -1.88960100 |
| H  | -6.14754800 | 0.62787800  | -0.45718800 |
| H  | -2.82772000 | -1.69340200 | 2.66589900  |
| H  | -4.96301600 | -2.35138700 | -1.74089700 |
| H  | -1.96321600 | -4.87322900 | 1.08964400  |
| H  | -1.56224600 | -3.77750200 | 2.39554900  |
| H  | 2.63273600  | -4.91688200 | 0.14646100  |
| H  | -1.05218800 | -1.70296000 | -0.33803500 |
| Li | 4.77272600  | 2.22115300  | -2.12484300 |
| Li | 2.60201700  | 0.10409700  | -1.36903500 |
| Li | -1.84057600 | 4.49012100  | 1.97952400  |

|    |             |             |             |
|----|-------------|-------------|-------------|
| Li | 2.37181200  | -3.95642300 | 2.29336300  |
| Li | 1.47964200  | 5.49415200  | 2.30989300  |
| Li | -3.94396100 | 1.99269400  | 1.91314000  |
| Li | -2.83385800 | -2.06032200 | -2.23222900 |
| Li | -0.60679600 | -0.19058500 | -1.93214400 |

**P5QLi<sub>9</sub> (by condensed Fukui function)**

E= -2166.644065 hartrees

| Symbol | X           | Y           | Z           |
|--------|-------------|-------------|-------------|
| C      | 3.77967200  | -1.69460500 | 1.02004700  |
| C      | 3.85536400  | -0.33461600 | 1.47312400  |
| C      | 4.48038300  | 0.67857300  | 0.76343300  |
| C      | 5.21631900  | 0.35181300  | -0.43585700 |
| C      | 4.88908900  | -0.90623700 | -1.01710900 |
| C      | 4.11625100  | -1.88173700 | -0.38303900 |
| C      | 4.28041400  | 2.14071000  | 1.12004300  |
| C      | 3.48787000  | -2.98184000 | -1.22585200 |
| C      | 2.94878800  | 2.70675200  | 0.61382000  |
| C      | 2.07291200  | 3.35223200  | 1.51058600  |
| C      | 0.81018000  | 3.88279900  | 1.14491600  |
| C      | 0.41063500  | 3.77695800  | -0.20635300 |
| C      | 1.28052100  | 3.15516500  | -1.09308100 |
| C      | 2.51526800  | 2.58058800  | -0.73638700 |
| C      | -0.94594400 | 4.21735400  | -0.71665700 |
| C      | -1.99204400 | 3.10803800  | -0.78566800 |
| C      | -3.13041300 | 3.12581900  | 0.04969500  |
| C      | -4.18866000 | 2.29196300  | -0.33969700 |
| C      | -4.05142100 | 1.17852100  | -1.17826900 |
| C      | -2.77675300 | 0.95159000  | -1.78343900 |
| C      | -1.87143800 | 2.04442800  | -1.69059800 |
| C      | -5.22208600 | 0.20750400  | -1.10536700 |
| C      | -4.44799200 | -2.12401500 | -0.88318600 |
| C      | -3.39956700 | -2.98331500 | -0.48038600 |
| C      | -2.89989000 | -2.78947300 | 0.86080600  |
| C      | -3.39514200 | -1.73910000 | 1.62651300  |
| C      | -4.28742900 | -0.76419400 | 1.11887100  |
| C      | -4.79151700 | -0.94861500 | -0.19713100 |
| C      | -1.75362900 | -3.63892000 | 1.34379200  |
| C      | 1.03732500  | -2.12057500 | -0.92248200 |
| C      | 2.03800700  | -3.13343900 | -0.80155800 |
| C      | 1.77883700  | -4.20847500 | 0.03708900  |
| C      | 0.65345200  | -4.29245800 | 0.90209800  |

|    |             |             |             |
|----|-------------|-------------|-------------|
| C  | -0.44023500 | -3.39636100 | 0.62215700  |
| C  | -0.19885100 | -2.34638300 | -0.24100100 |
| O  | 1.18237100  | -0.98256200 | -1.62995700 |
| O  | 3.39505500  | -2.63685700 | 1.81577700  |
| O  | 0.08006200  | 4.56412900  | 2.09025900  |
| O  | -3.21368900 | 3.75032500  | 1.25450600  |
| O  | -2.80796400 | -3.71952500 | -1.37682900 |
| O  | 5.99357100  | 1.20931600  | -1.04099900 |
| O  | 3.18195000  | 1.90504900  | -1.67737700 |
| O  | -2.35748300 | -0.17906500 | -2.39028500 |
| O  | -4.68236200 | 0.31363200  | 1.89339100  |
| O  | 0.71891700  | -5.00742800 | 1.98458400  |
| H  | 3.37173900  | -0.11879800 | 2.42489000  |
| H  | 5.24146900  | -1.08741300 | -2.03359500 |
| H  | 5.11507000  | 2.71183400  | 0.69330700  |
| H  | 4.32096000  | 2.28218700  | 2.20780900  |
| H  | 3.98965900  | -3.94924200 | -1.09757400 |
| H  | 3.59367600  | -2.71005900 | -2.28372300 |
| H  | 2.31920700  | 3.31700200  | 2.57878200  |
| H  | 1.00737500  | 3.07609500  | -2.14271700 |
| H  | -0.81487700 | 4.61767800  | -1.73038700 |
| H  | -1.34031400 | 5.05468000  | -0.12651000 |
| H  | -5.14572000 | 2.44381700  | 0.16041400  |
| H  | -0.99491700 | 2.01805400  | -2.34012800 |
| H  | -5.49233500 | -0.20257300 | -2.08378400 |
| H  | -6.10020600 | 0.77058700  | -0.75465100 |
| H  | -3.00858300 | -1.58327200 | 2.63320500  |
| H  | -4.84162000 | -2.26783900 | -1.89192700 |
| H  | -1.99237100 | -4.70248500 | 1.21068400  |
| H  | -1.60288600 | -3.50304800 | 2.42297800  |
| H  | 2.55823500  | -4.95552300 | 0.18557700  |
| H  | -0.98733500 | -1.60008600 | -0.35295100 |
| Li | 4.91124800  | 2.10421900  | -2.09633400 |
| Li | 2.72158500  | 0.05811700  | -1.31685200 |
| Li | -1.71971100 | 4.43910400  | 1.96257900  |
| Li | 2.29785600  | -3.96080800 | 2.29926700  |
| Li | 1.61019000  | 5.41160600  | 2.35019800  |
| Li | -3.84000900 | 1.94966200  | 1.80640100  |
| Li | -2.67494000 | -2.04870200 | -2.27948300 |
| Li | -0.48087900 | -0.21120400 | -2.01434100 |
| Li | -6.24844300 | -0.45746900 | 1.63272300  |

**P5QLi<sub>10</sub> (by condensed Fukui function)**

E= -2174.26431 hartrees

| Symbol | X           | Y           | Z           |
|--------|-------------|-------------|-------------|
| C      | 2.23617700  | -2.62271600 | 1.21852900  |
| C      | 3.26252800  | -1.69266100 | 1.49681400  |
| C      | 4.42531100  | -1.55345400 | 0.73432400  |
| C      | 4.69992300  | -2.47833300 | -0.32004100 |
| C      | 3.63495900  | -3.36656100 | -0.63394100 |
| C      | 2.40385100  | -3.41179300 | 0.04189200  |
| C      | 5.21204000  | -0.25899400 | 0.81640100  |
| C      | 1.28695300  | -4.20639800 | -0.62311400 |
| C      | 4.35970800  | 0.90168700  | 0.30882600  |
| C      | 4.08644000  | 1.99885500  | 1.14911800  |
| C      | 3.20415100  | 3.05396900  | 0.80772500  |
| C      | 2.58580600  | 3.01886800  | -0.46423300 |
| C      | 2.87186600  | 1.94296500  | -1.29936700 |
| C      | 3.70492700  | 0.86170000  | -0.95483100 |
| C      | 1.58422900  | 4.05559100  | -0.92888100 |
| C      | 0.11926600  | 3.65911400  | -0.79061700 |
| C      | -0.71255400 | 4.27384600  | 0.17126500  |
| C      | -2.09238500 | 4.17658900  | -0.07038500 |
| C      | -2.69507500 | 3.20472500  | -0.86854700 |
| C      | -1.83813400 | 2.31923700  | -1.59640300 |
| C      | -0.47053400 | 2.70748900  | -1.64485900 |
| C      | -4.19776300 | 3.07895800  | -0.66988300 |
| C      | -5.03727500 | 0.78511100  | -0.79373000 |
| C      | -4.85078300 | -0.59525900 | -0.58050500 |
| C      | -4.37613300 | -0.95074500 | 0.71163400  |
| C      | -3.95775400 | 0.03759600  | 1.61609200  |
| C      | -3.89118200 | 1.41784400  | 1.28231100  |
| C      | -4.47282300 | 1.76519200  | 0.02290300  |
| C      | -4.09221800 | -2.41625400 | 0.89424700  |
| C      | -0.47199200 | -2.29450300 | -0.48075100 |
| C      | -0.12067700 | -3.67291600 | -0.42446200 |
| C      | -1.09060200 | -4.60351600 | 0.00353800  |
| C      | -2.40769400 | -4.26186700 | 0.40811600  |
| C      | -2.70219900 | -2.86330300 | 0.45447800  |
| C      | -1.75015100 | -1.94273900 | 0.00345000  |
| O      | 0.39478500  | -1.26138600 | -0.81695800 |
| O      | 1.09399200  | -2.54805200 | 1.94976000  |
| O      | 3.06293100  | 4.10152300  | 1.68193000  |
| O      | -0.30281400 | 4.82925600  | 1.32760600  |
| O      | -4.86210000 | -1.42958700 | -1.61213900 |
| O      | 5.76478000  | -2.39328700 | -1.08122200 |

|    |             |             |             |
|----|-------------|-------------|-------------|
| O  | 3.78421000  | -0.17625800 | -1.80263700 |
| O  | -2.18592900 | 1.14970300  | -2.19161000 |
| O  | -3.26345200 | 2.28797000  | 2.06526100  |
| O  | -3.29030100 | -5.16502200 | 0.75478900  |
| H  | 3.08812200  | -1.00554400 | 2.32802400  |
| H  | 3.76685600  | -3.98355300 | -1.52283300 |
| H  | 6.12777400  | -0.37627100 | 0.22437000  |
| H  | 5.52721100  | -0.04315400 | 1.84579400  |
| H  | 1.29786800  | -5.24665500 | -0.27261100 |
| H  | 1.51697600  | -4.26348100 | -1.69661900 |
| H  | 4.46393200  | 1.96387200  | 2.17759100  |
| H  | 2.42211800  | 1.90449400  | -2.28860500 |
| H  | 1.77765900  | 4.26068400  | -1.99019500 |
| H  | 1.74943500  | 5.00755500  | -0.40951100 |
| H  | -2.73964500 | 4.82108600  | 0.52719100  |
| H  | 0.14900600  | 2.23267500  | -2.40963000 |
| H  | -4.73215400 | 3.10083600  | -1.62726900 |
| H  | -4.53815600 | 3.94659600  | -0.09221400 |
| H  | -3.53802300 | -0.25527000 | 2.57997300  |
| H  | -5.45404400 | 1.08614100  | -1.75929100 |
| H  | -4.80790500 | -2.91200500 | 0.20251300  |
| H  | -4.27739100 | -2.74166900 | 1.93747000  |
| H  | -0.82306900 | -5.65705300 | 0.04276400  |
| H  | -2.02612800 | -0.88971400 | 0.06123600  |
| Li | 5.28444100  | -1.11318900 | -2.20000300 |
| Li | 2.38943700  | -1.36094000 | -1.18692400 |
| Li | 1.38364900  | 4.78162800  | 1.85341600  |
| Li | -0.52523300 | -3.27421200 | 1.72157200  |
| Li | 4.82314600  | 4.14339900  | 1.62254600  |
| Li | -1.98211900 | 3.47782700  | 1.99425900  |
| Li | -3.64883600 | -0.06460700 | -2.25337600 |
| Li | -0.68754600 | 0.21059800  | -1.58200100 |
| Li | -4.92913400 | -4.66887800 | 0.98253300  |
| Li | 0.81869400  | -0.96908800 | 1.03495400  |
